# Supplementary material for: lncRNA2919 Suppresses Rabbit Dermal Papilla Cell Proliferation via trans-Regulatory Actions
Source: MDPI journal article supplement (doi:10.3390/cells11152443), 2022-08-06
Supplement: s1 [file s1]

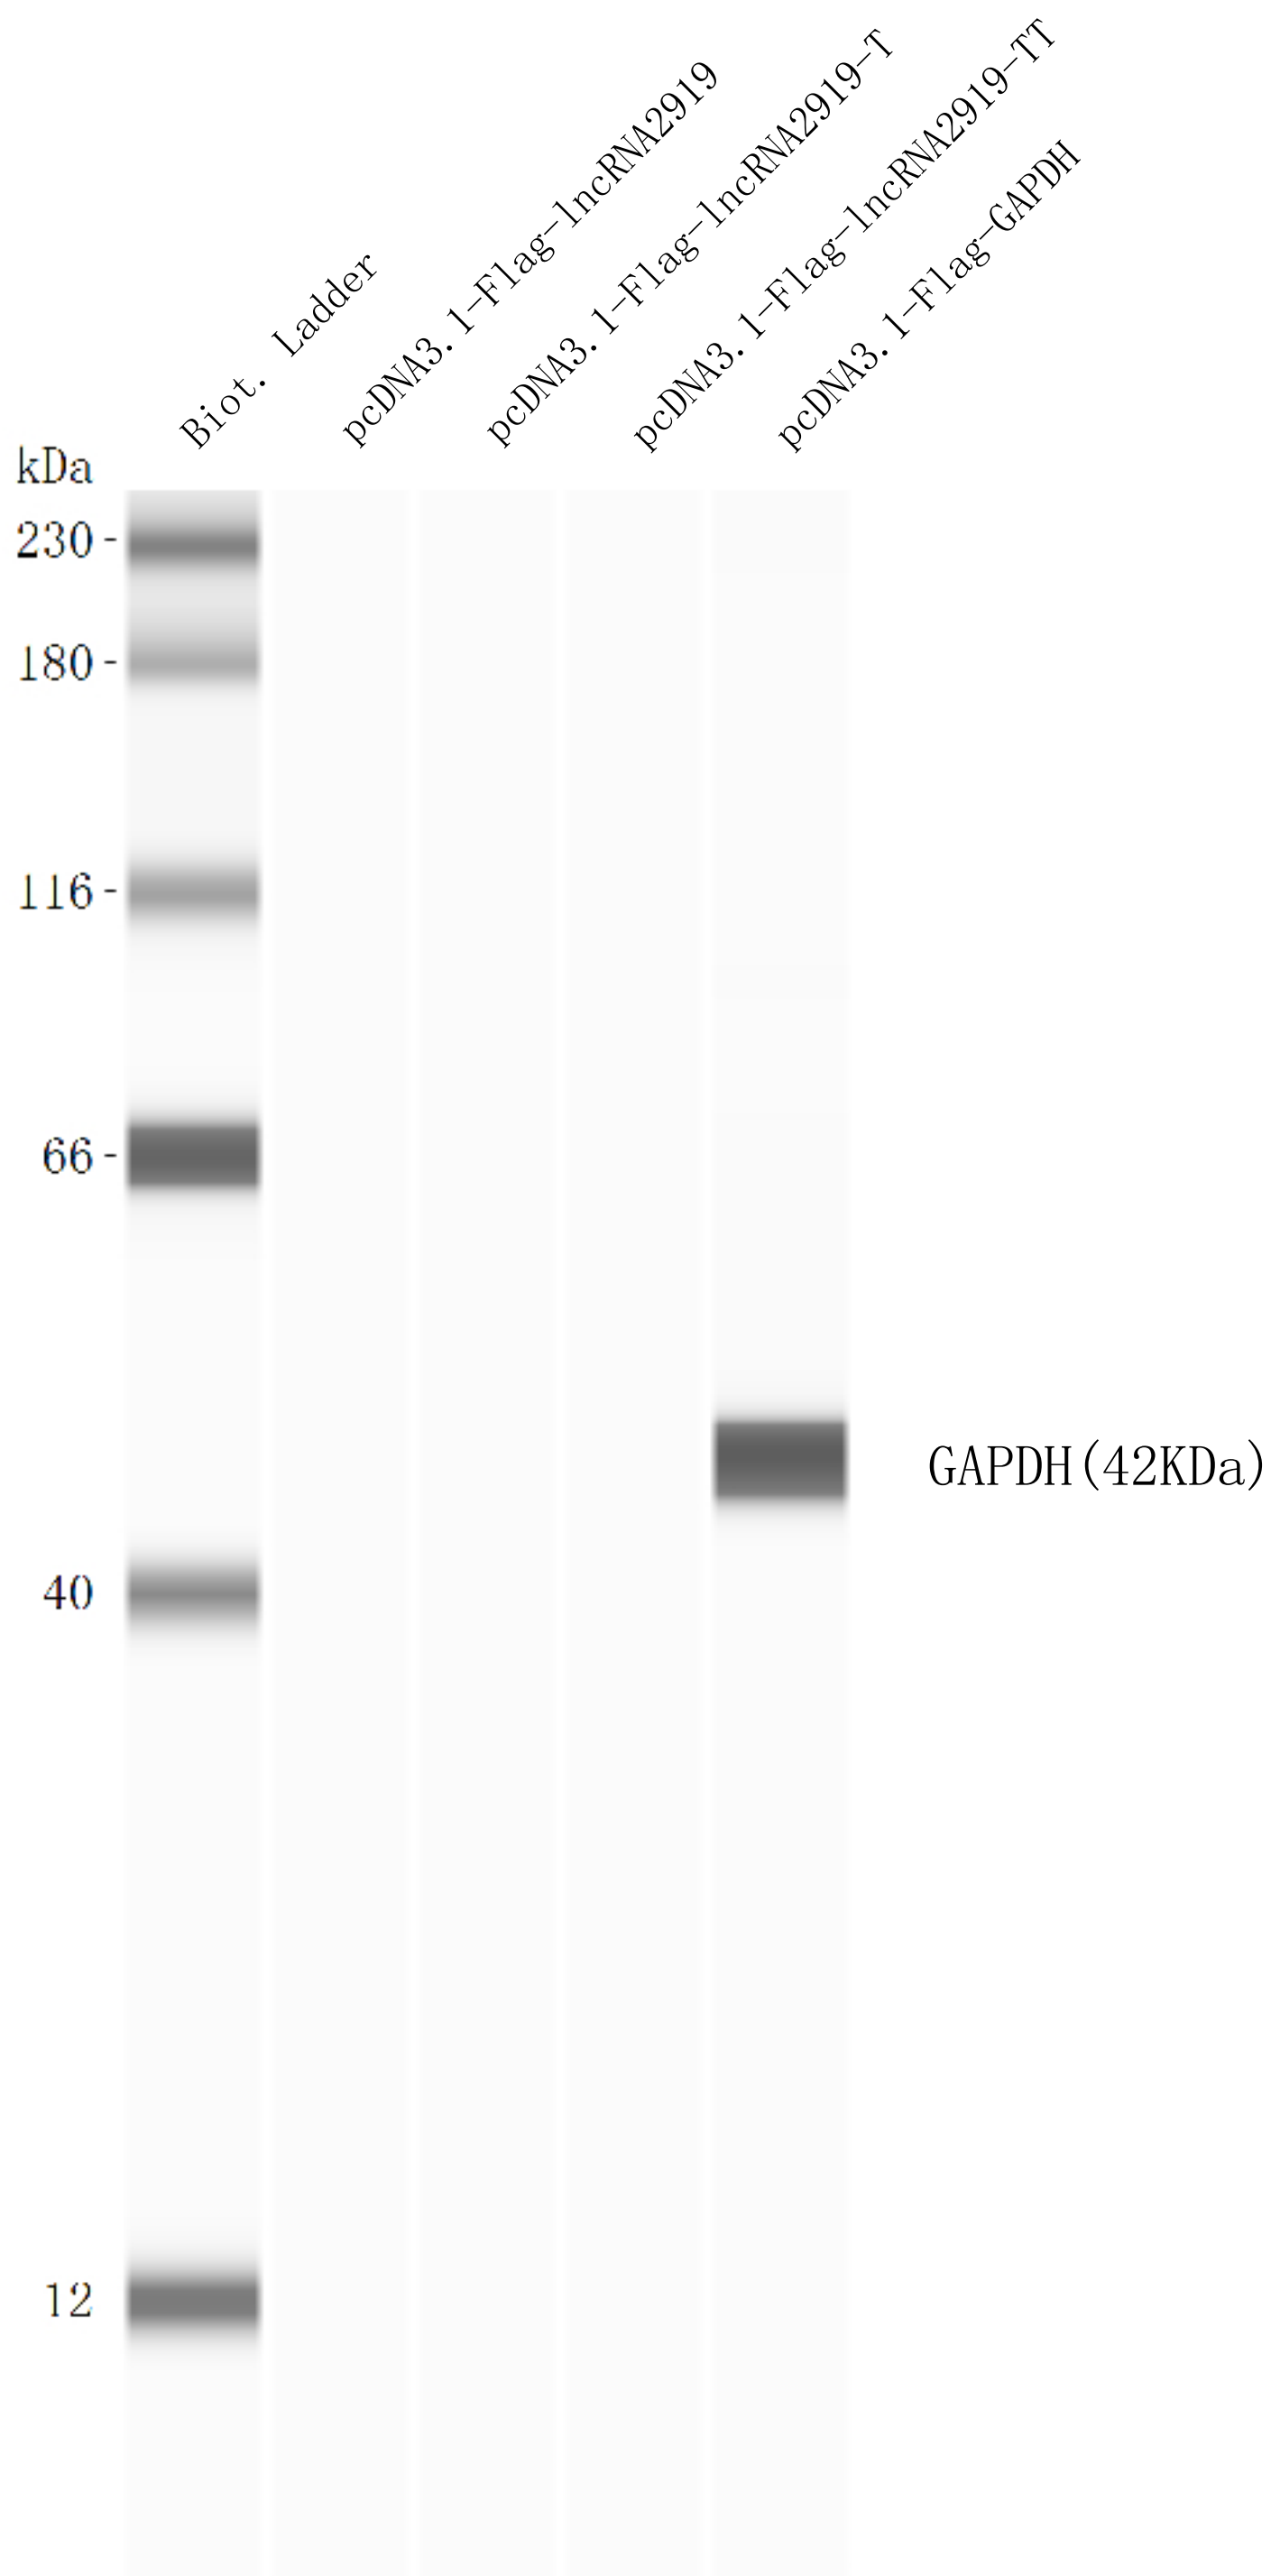

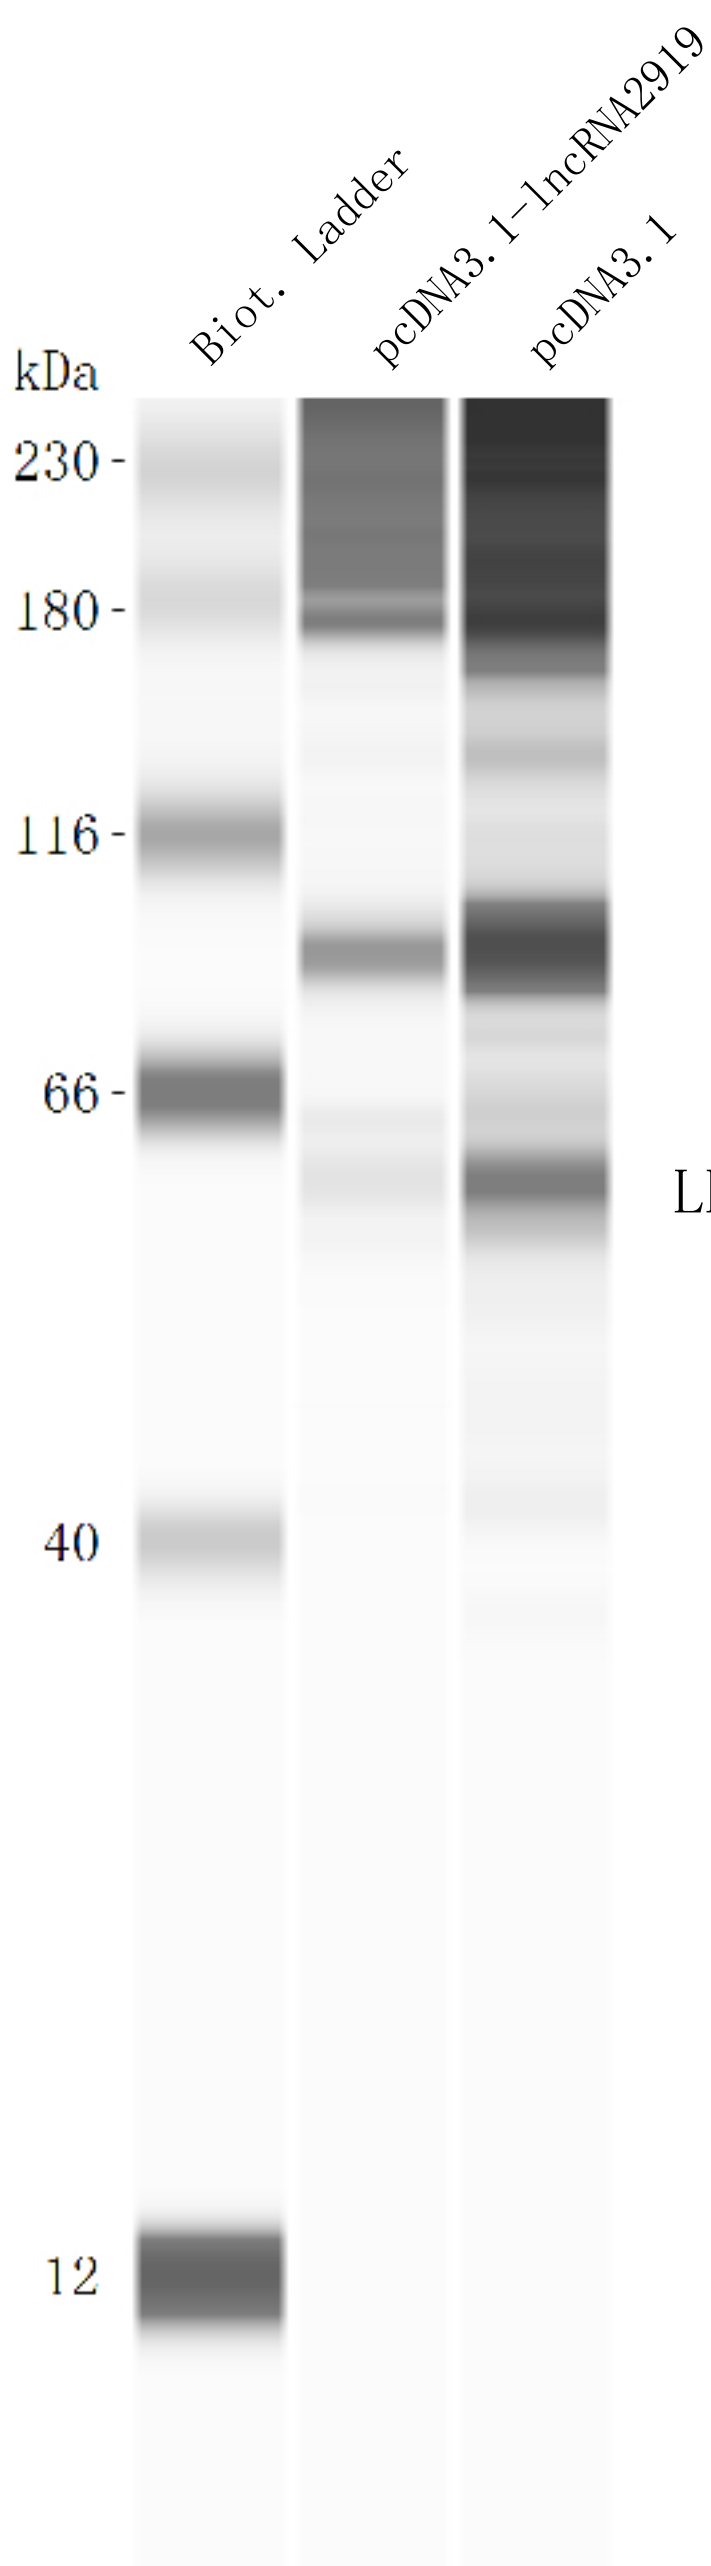

LEF1 (61KDa)

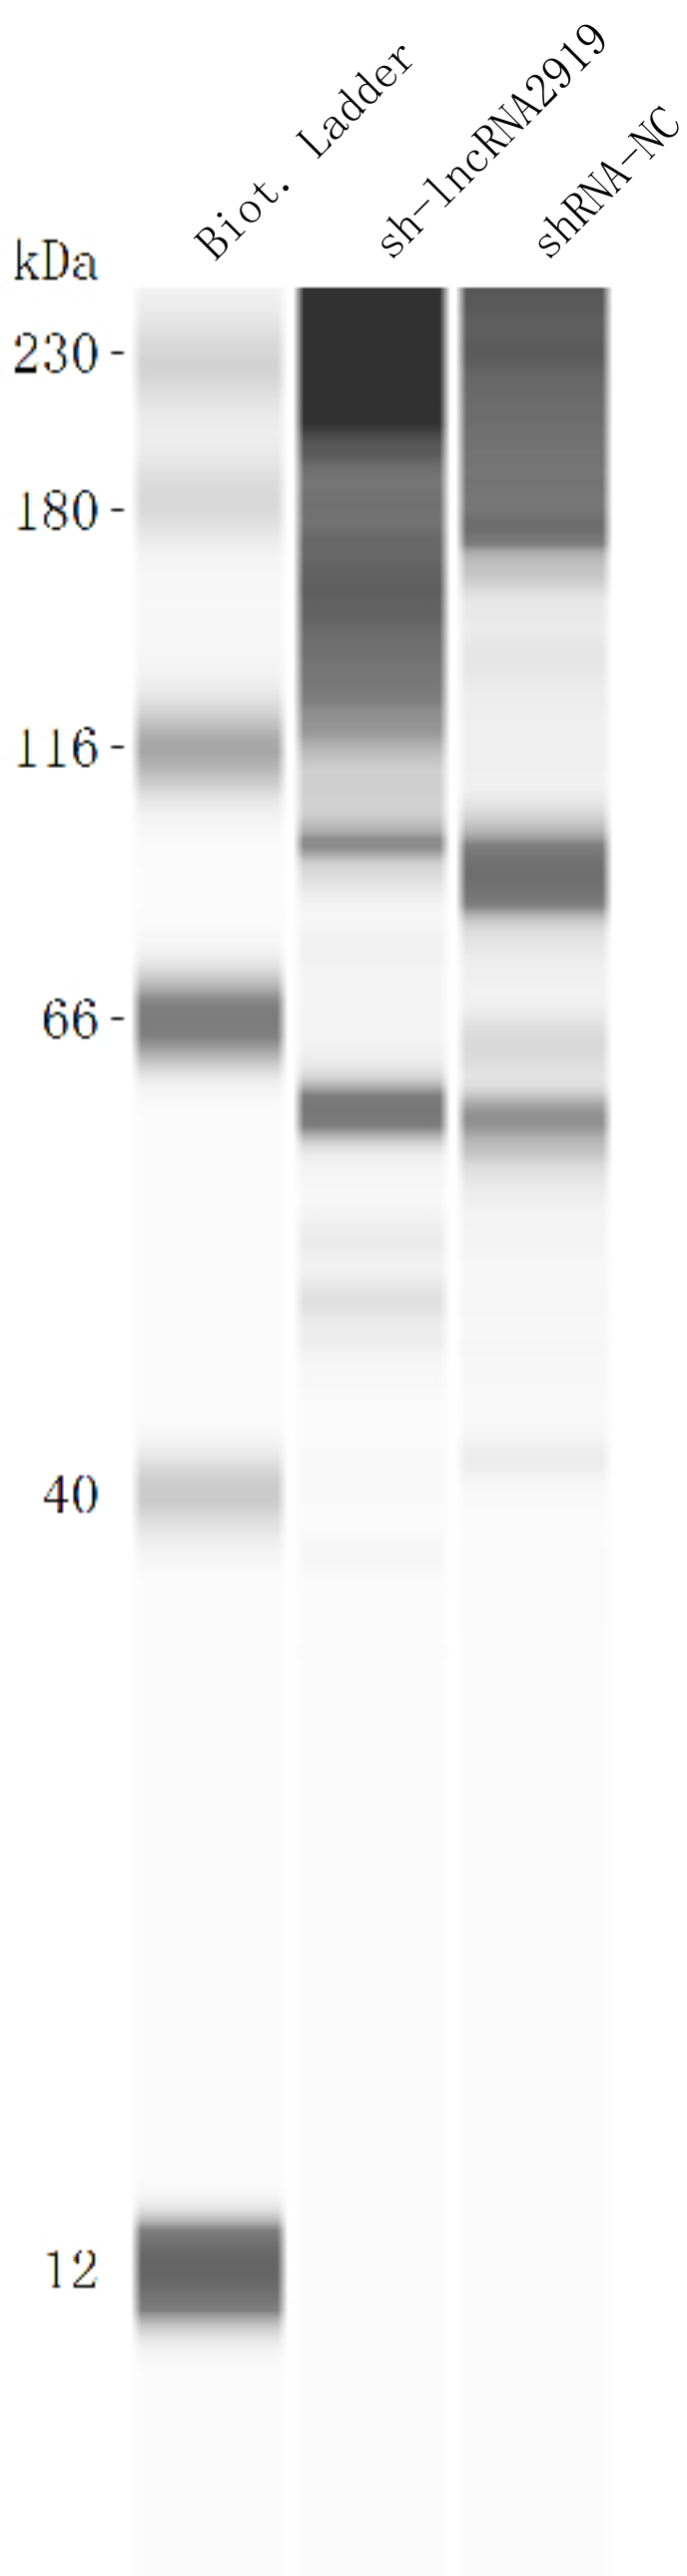

LEF1 (61KDa)

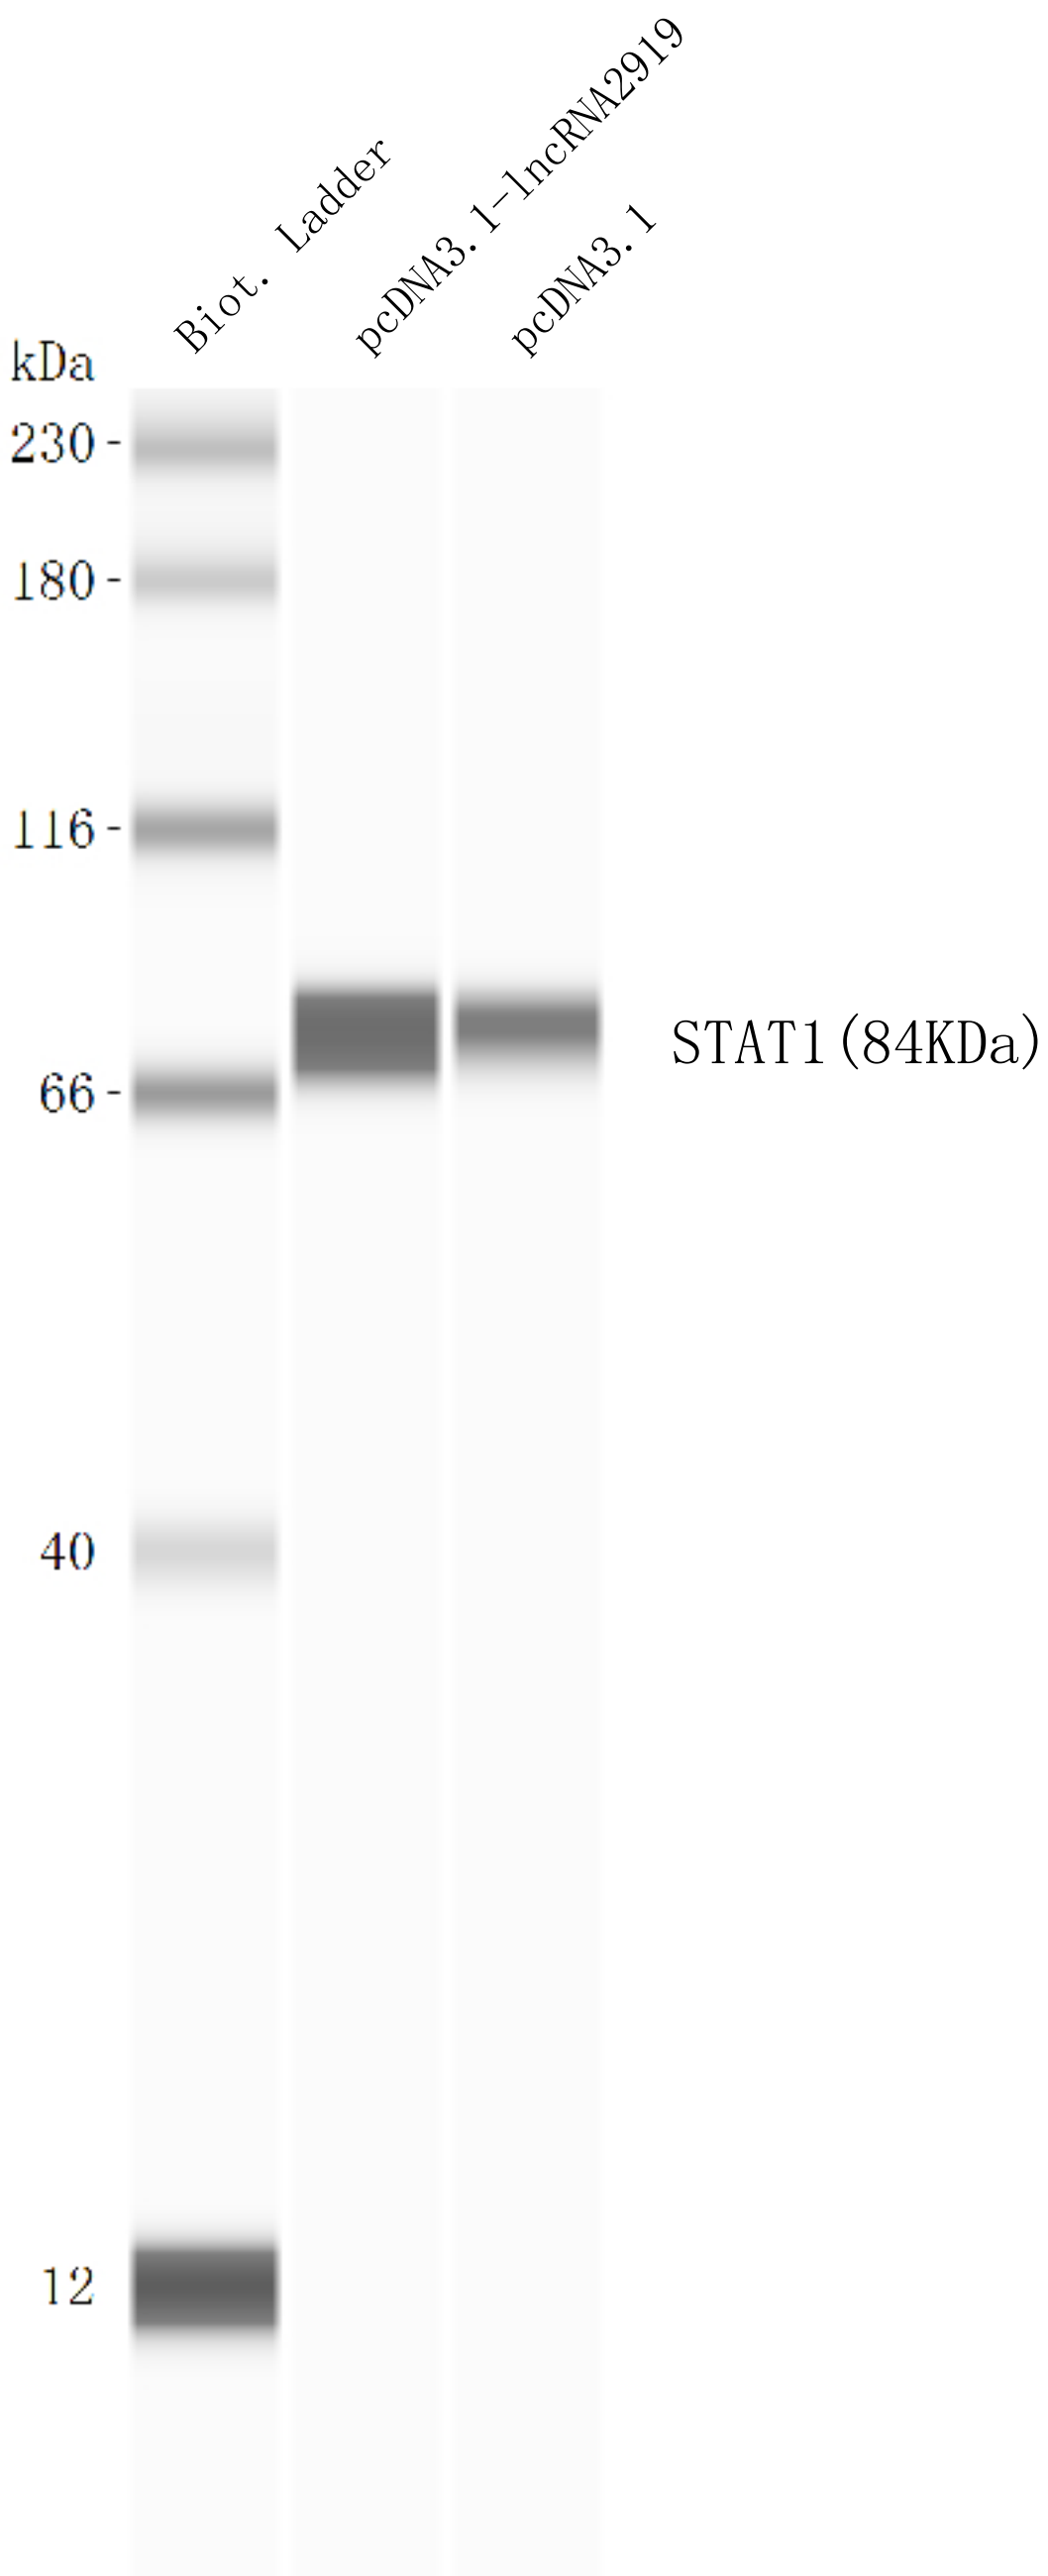

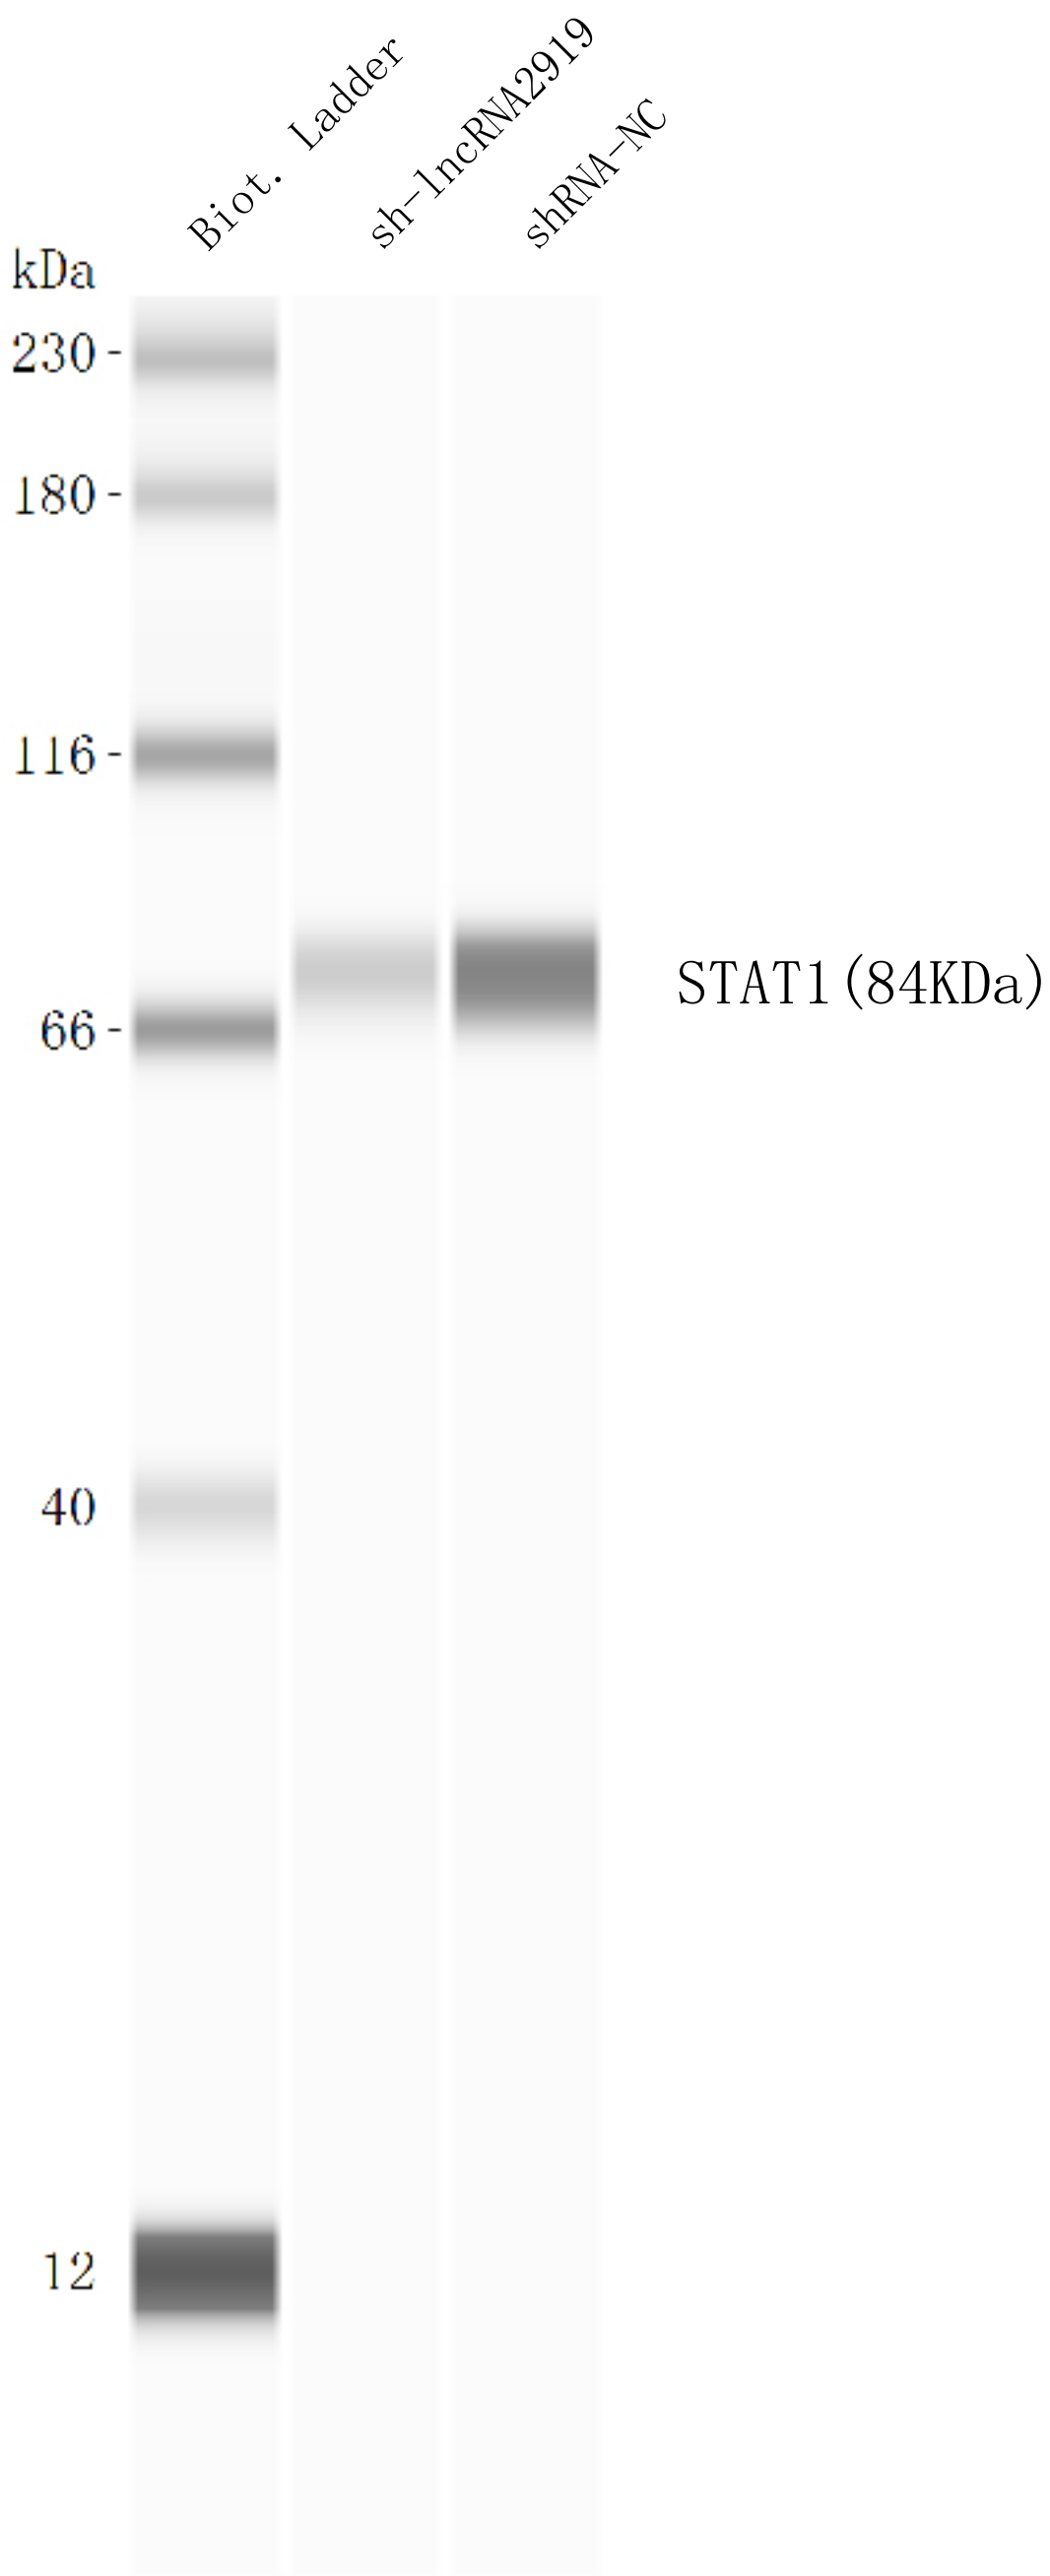

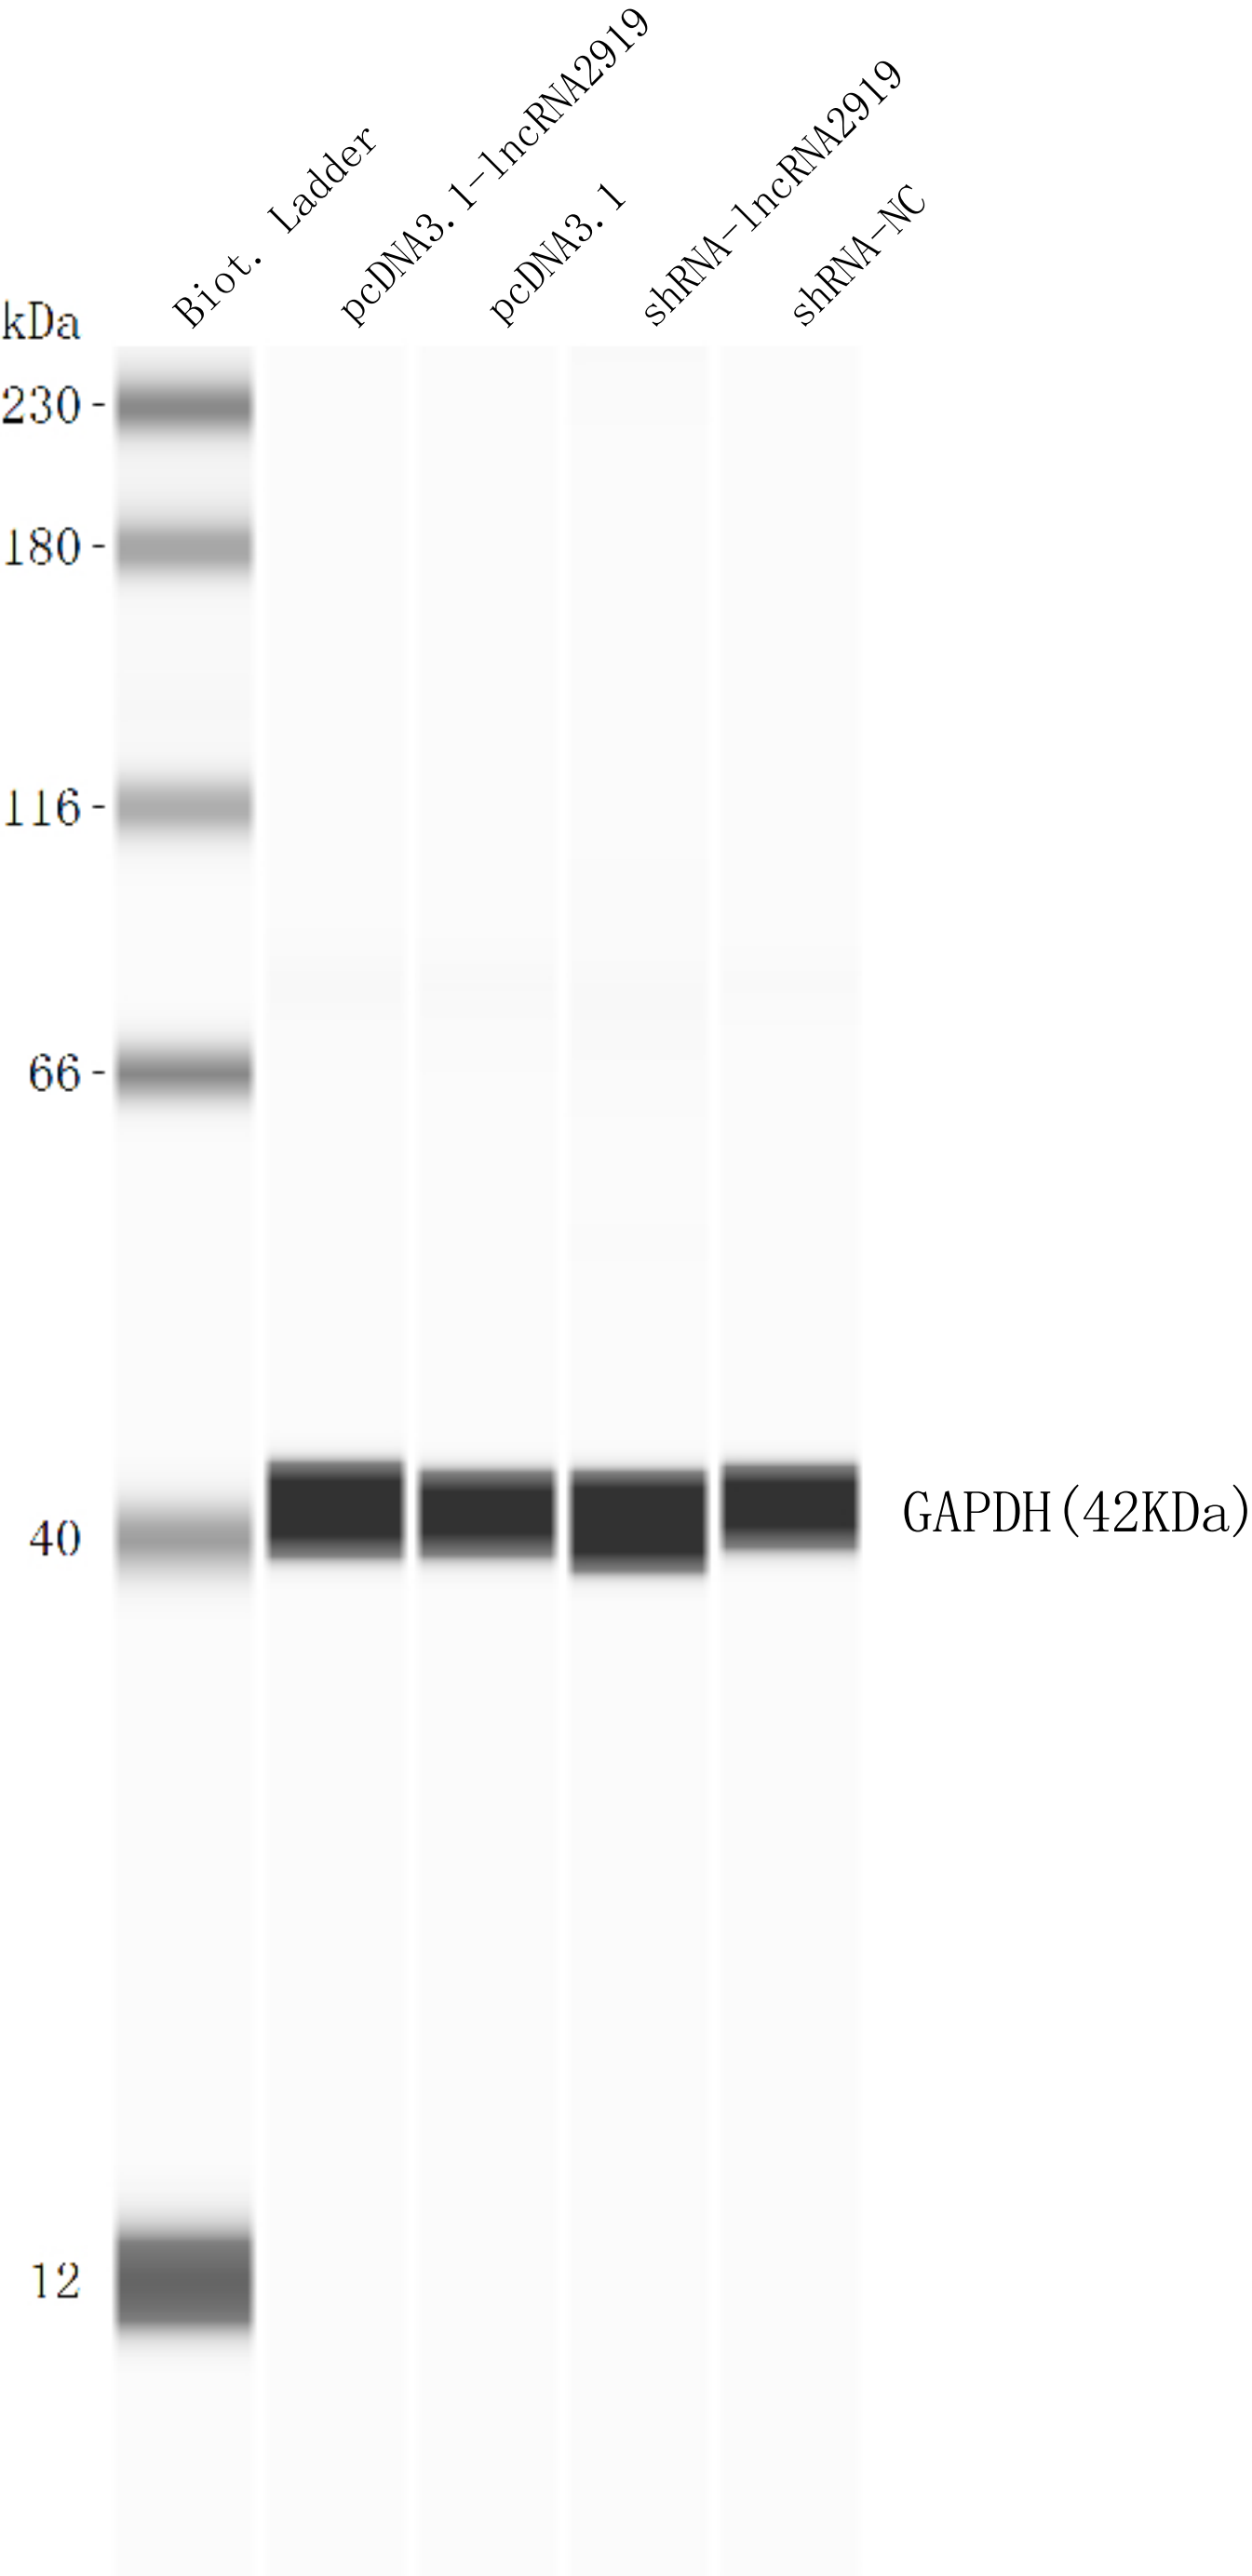

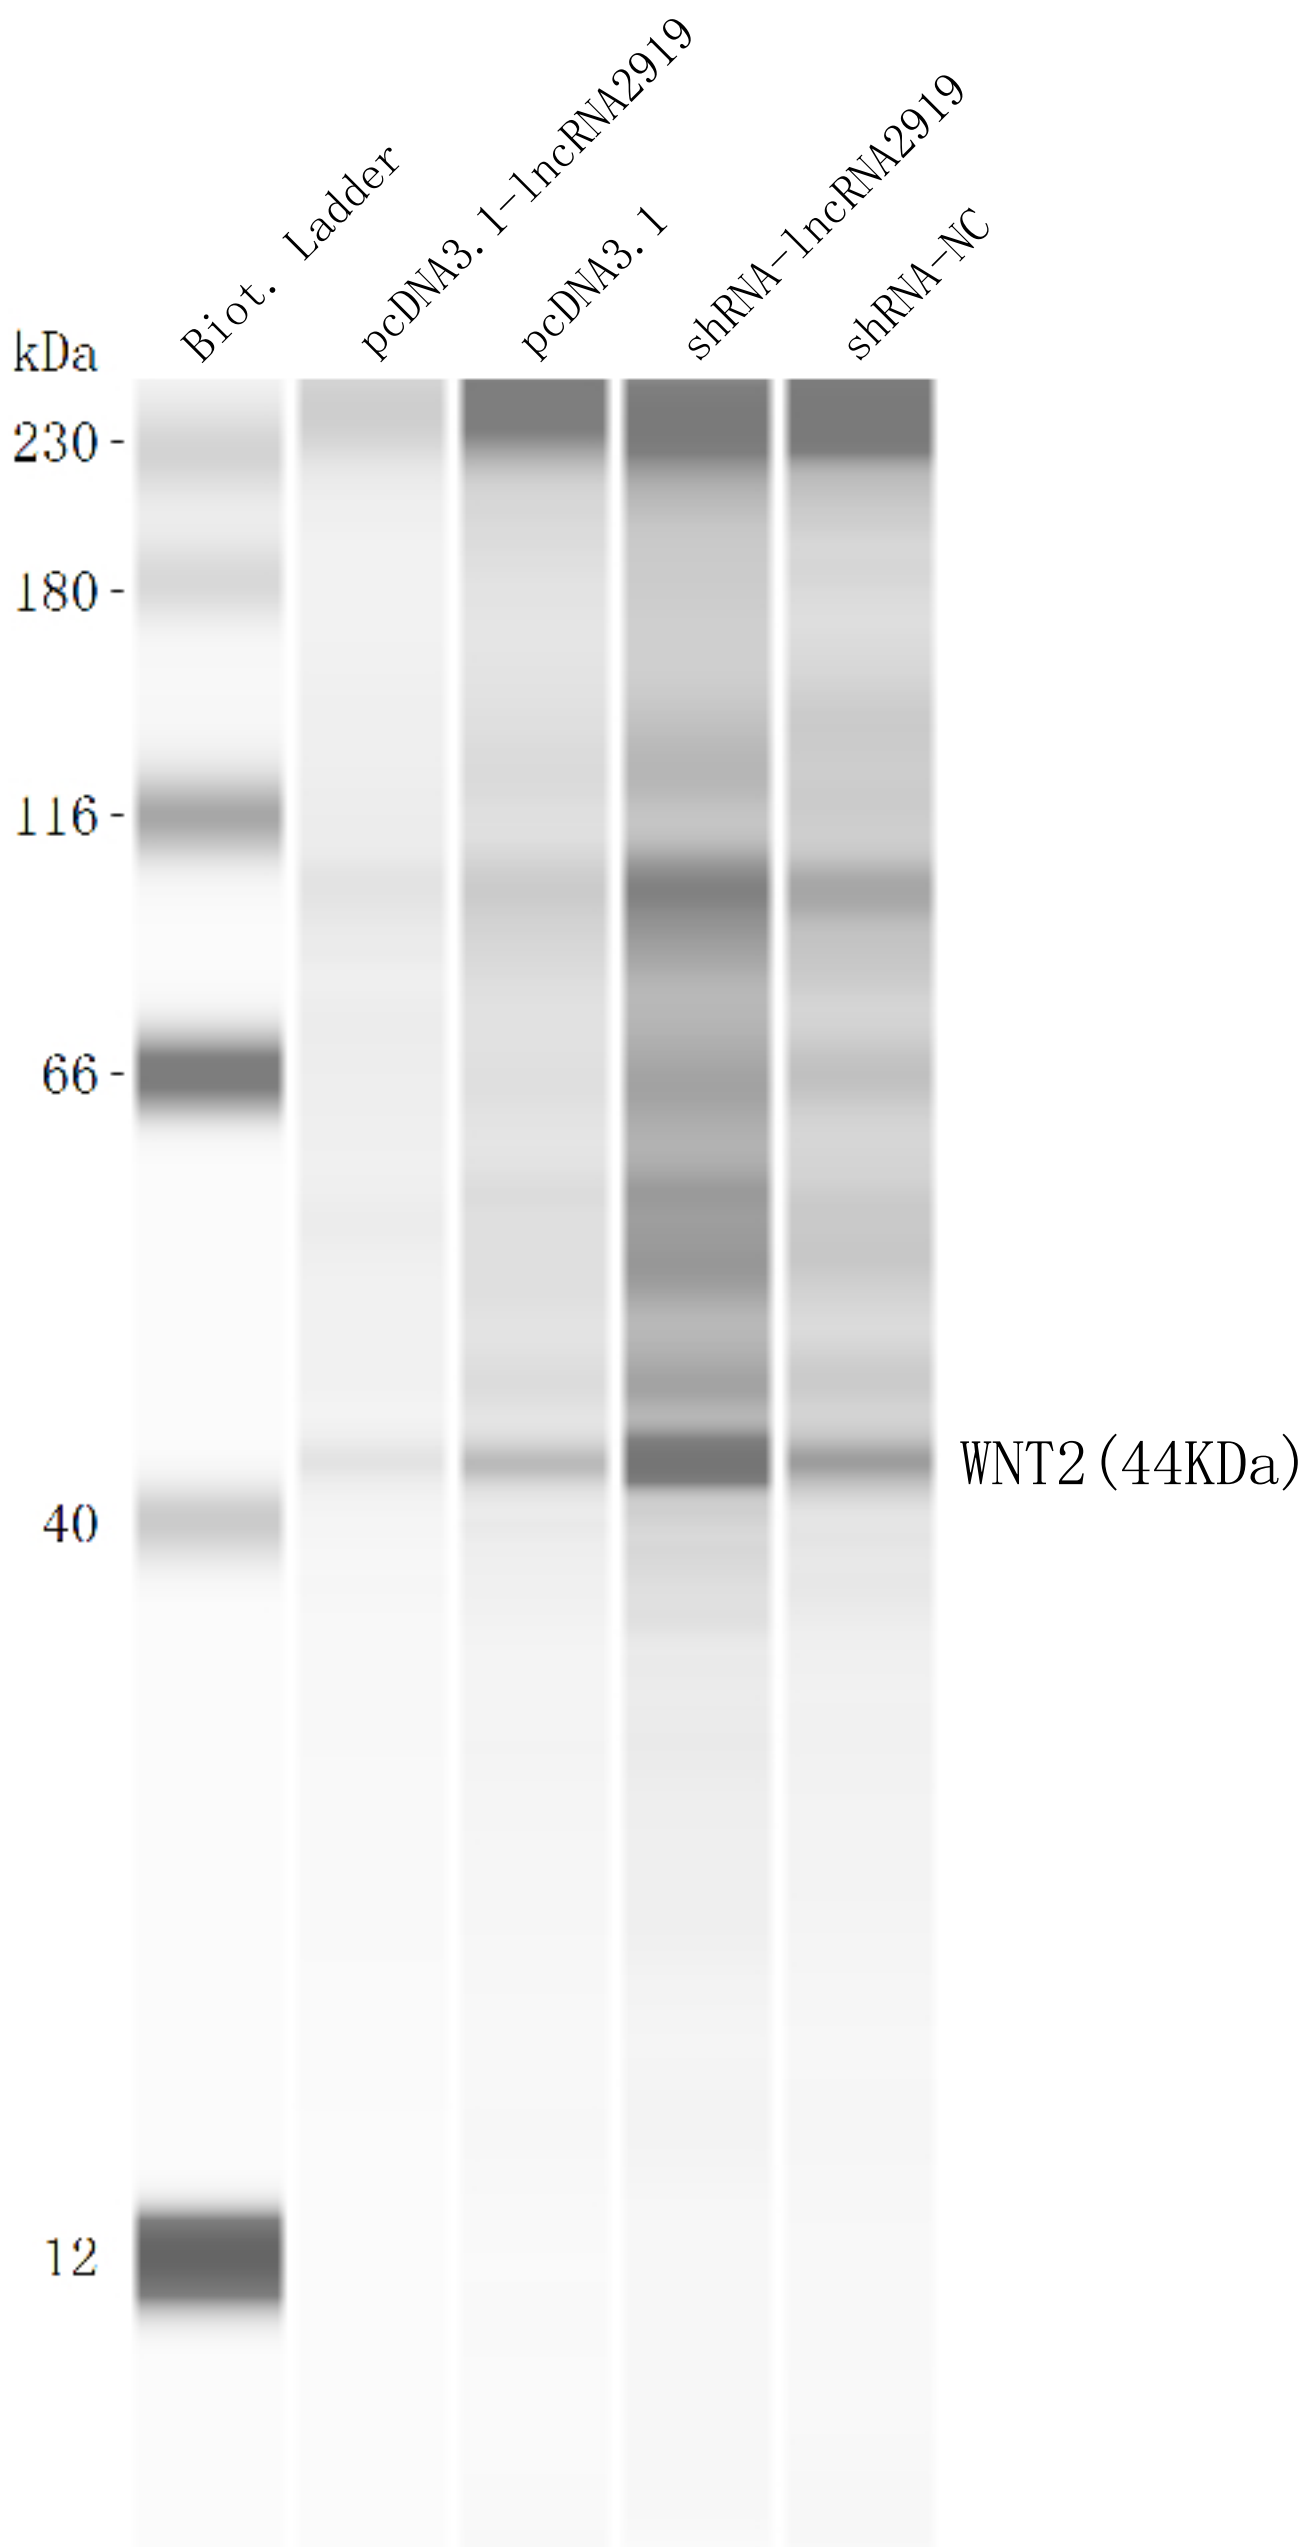

kDa

230 -

180 -

116 -

66 -

40

12

Biot. Ladder  
pcDNA3.1-lncRNA2919  
pcDNA3.1  
shRNA-lncRNA2919  
shRNA-NC

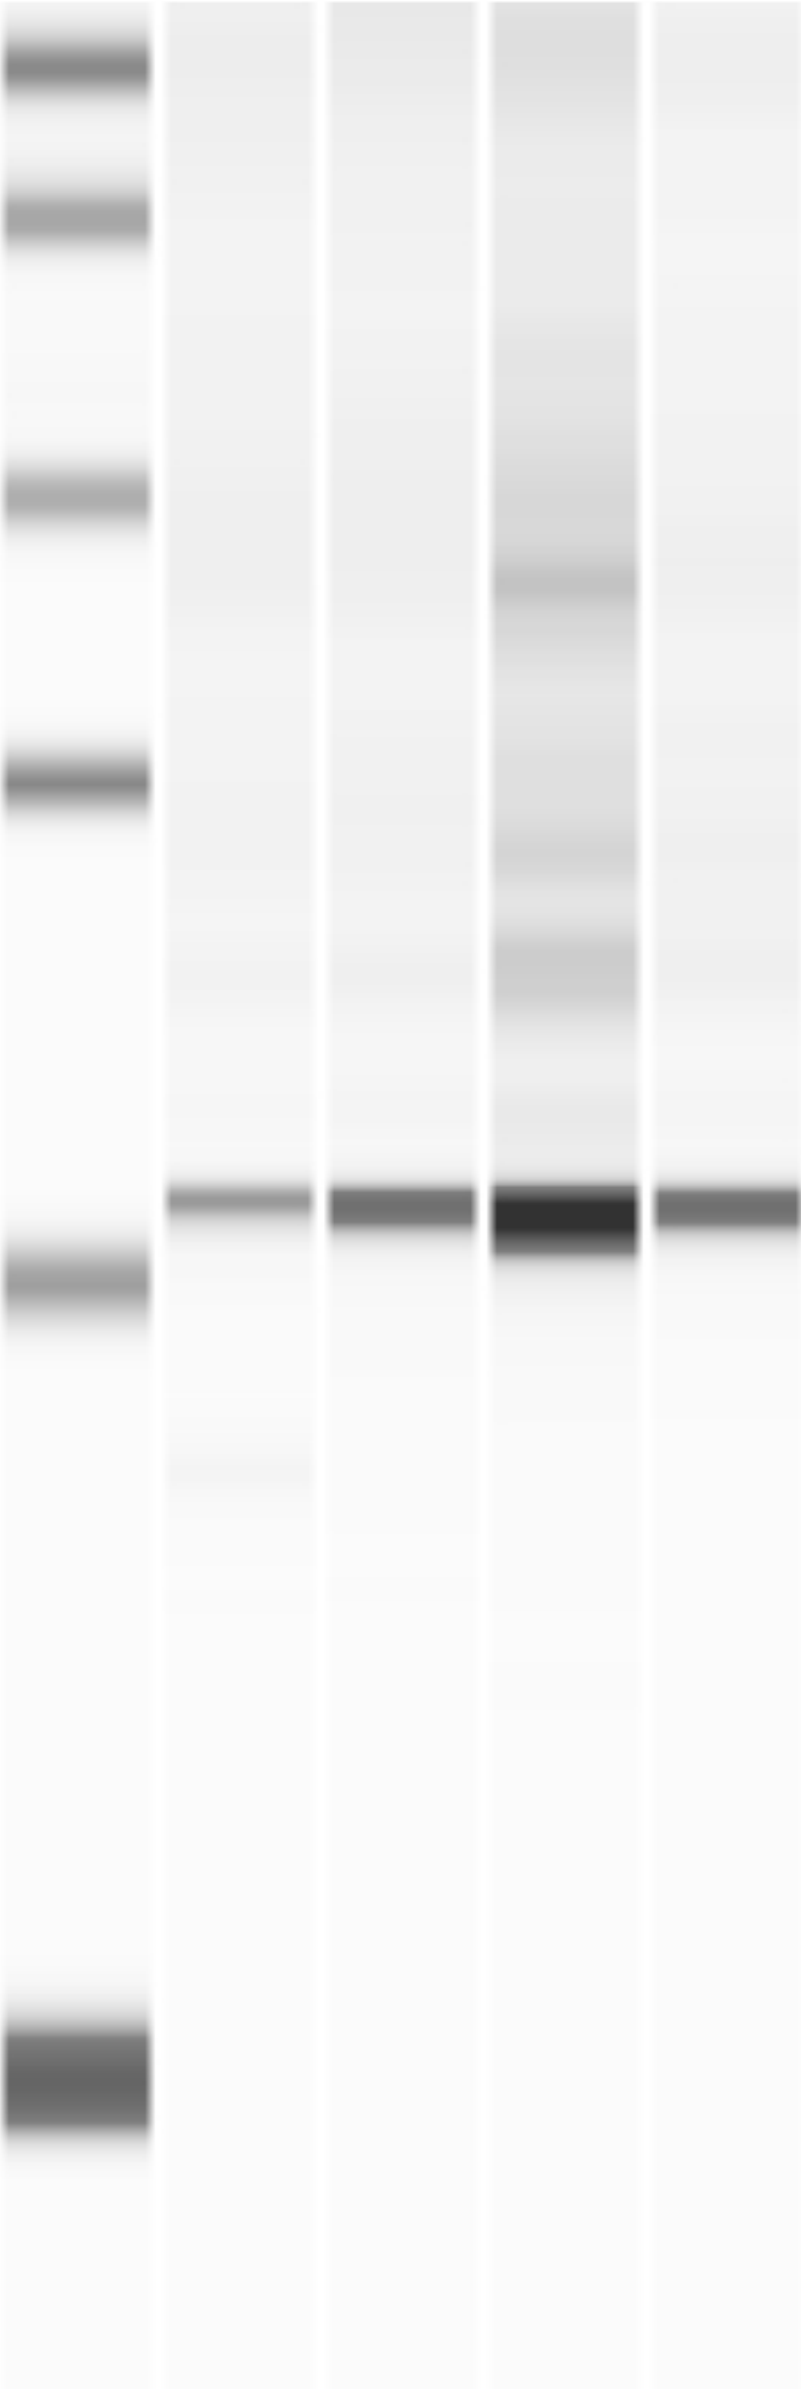

CCND1 (43KDa)



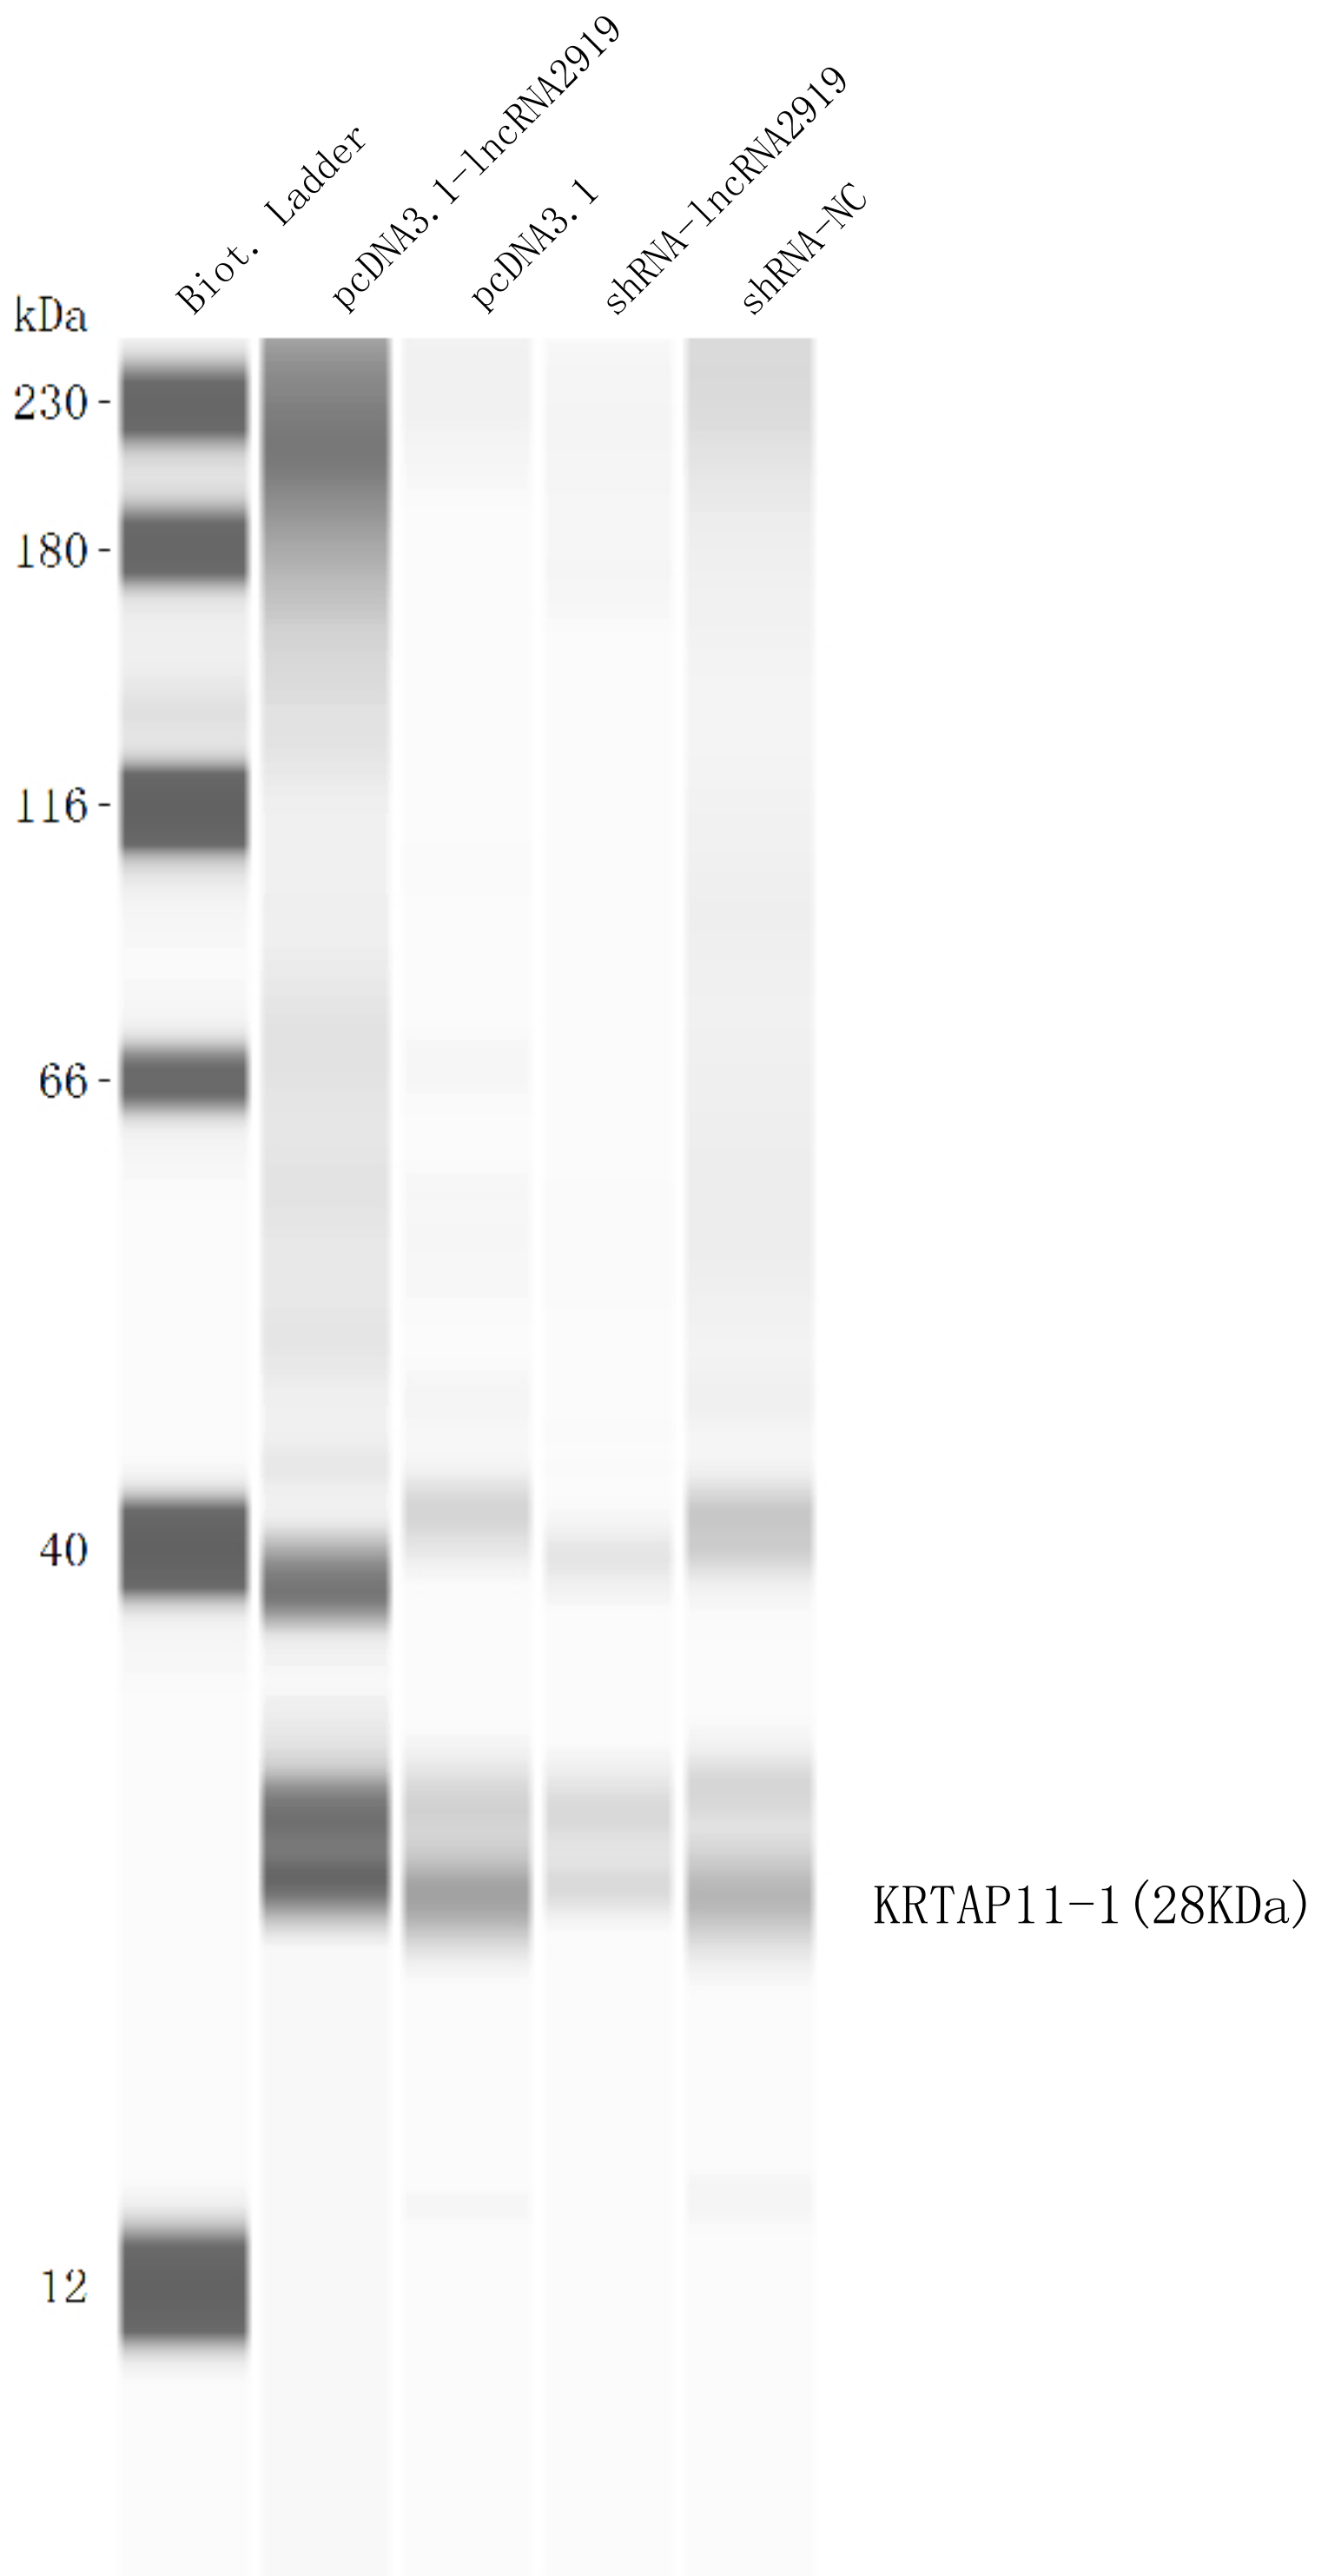

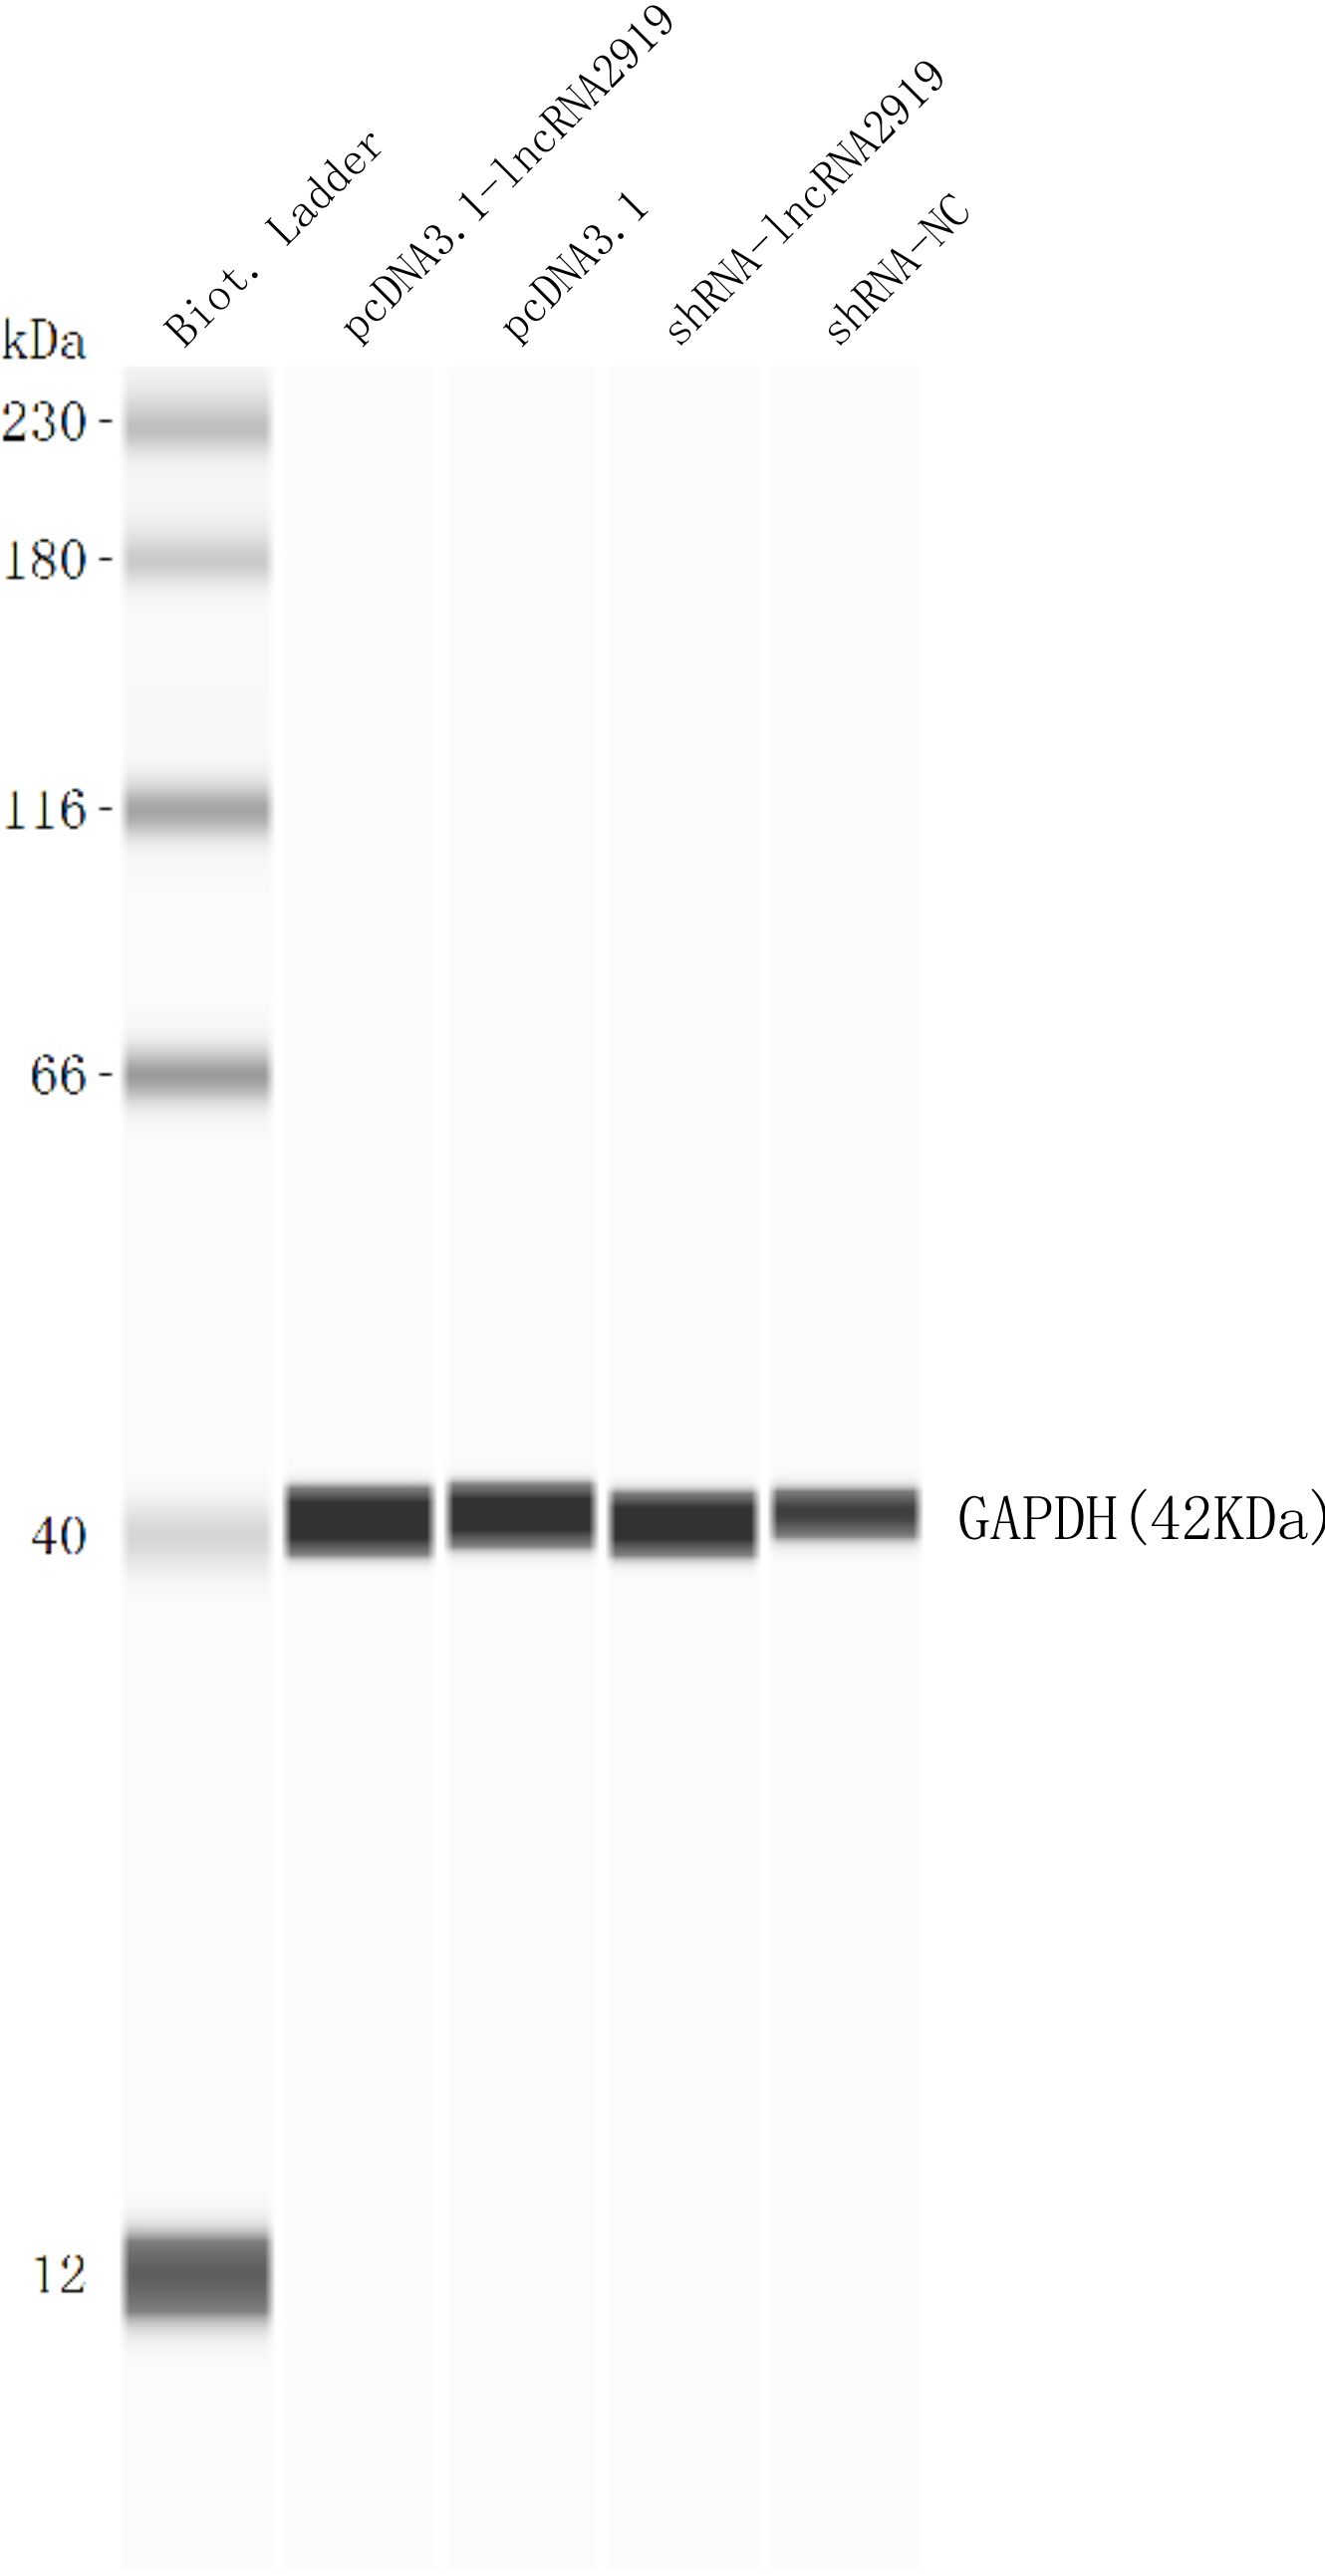

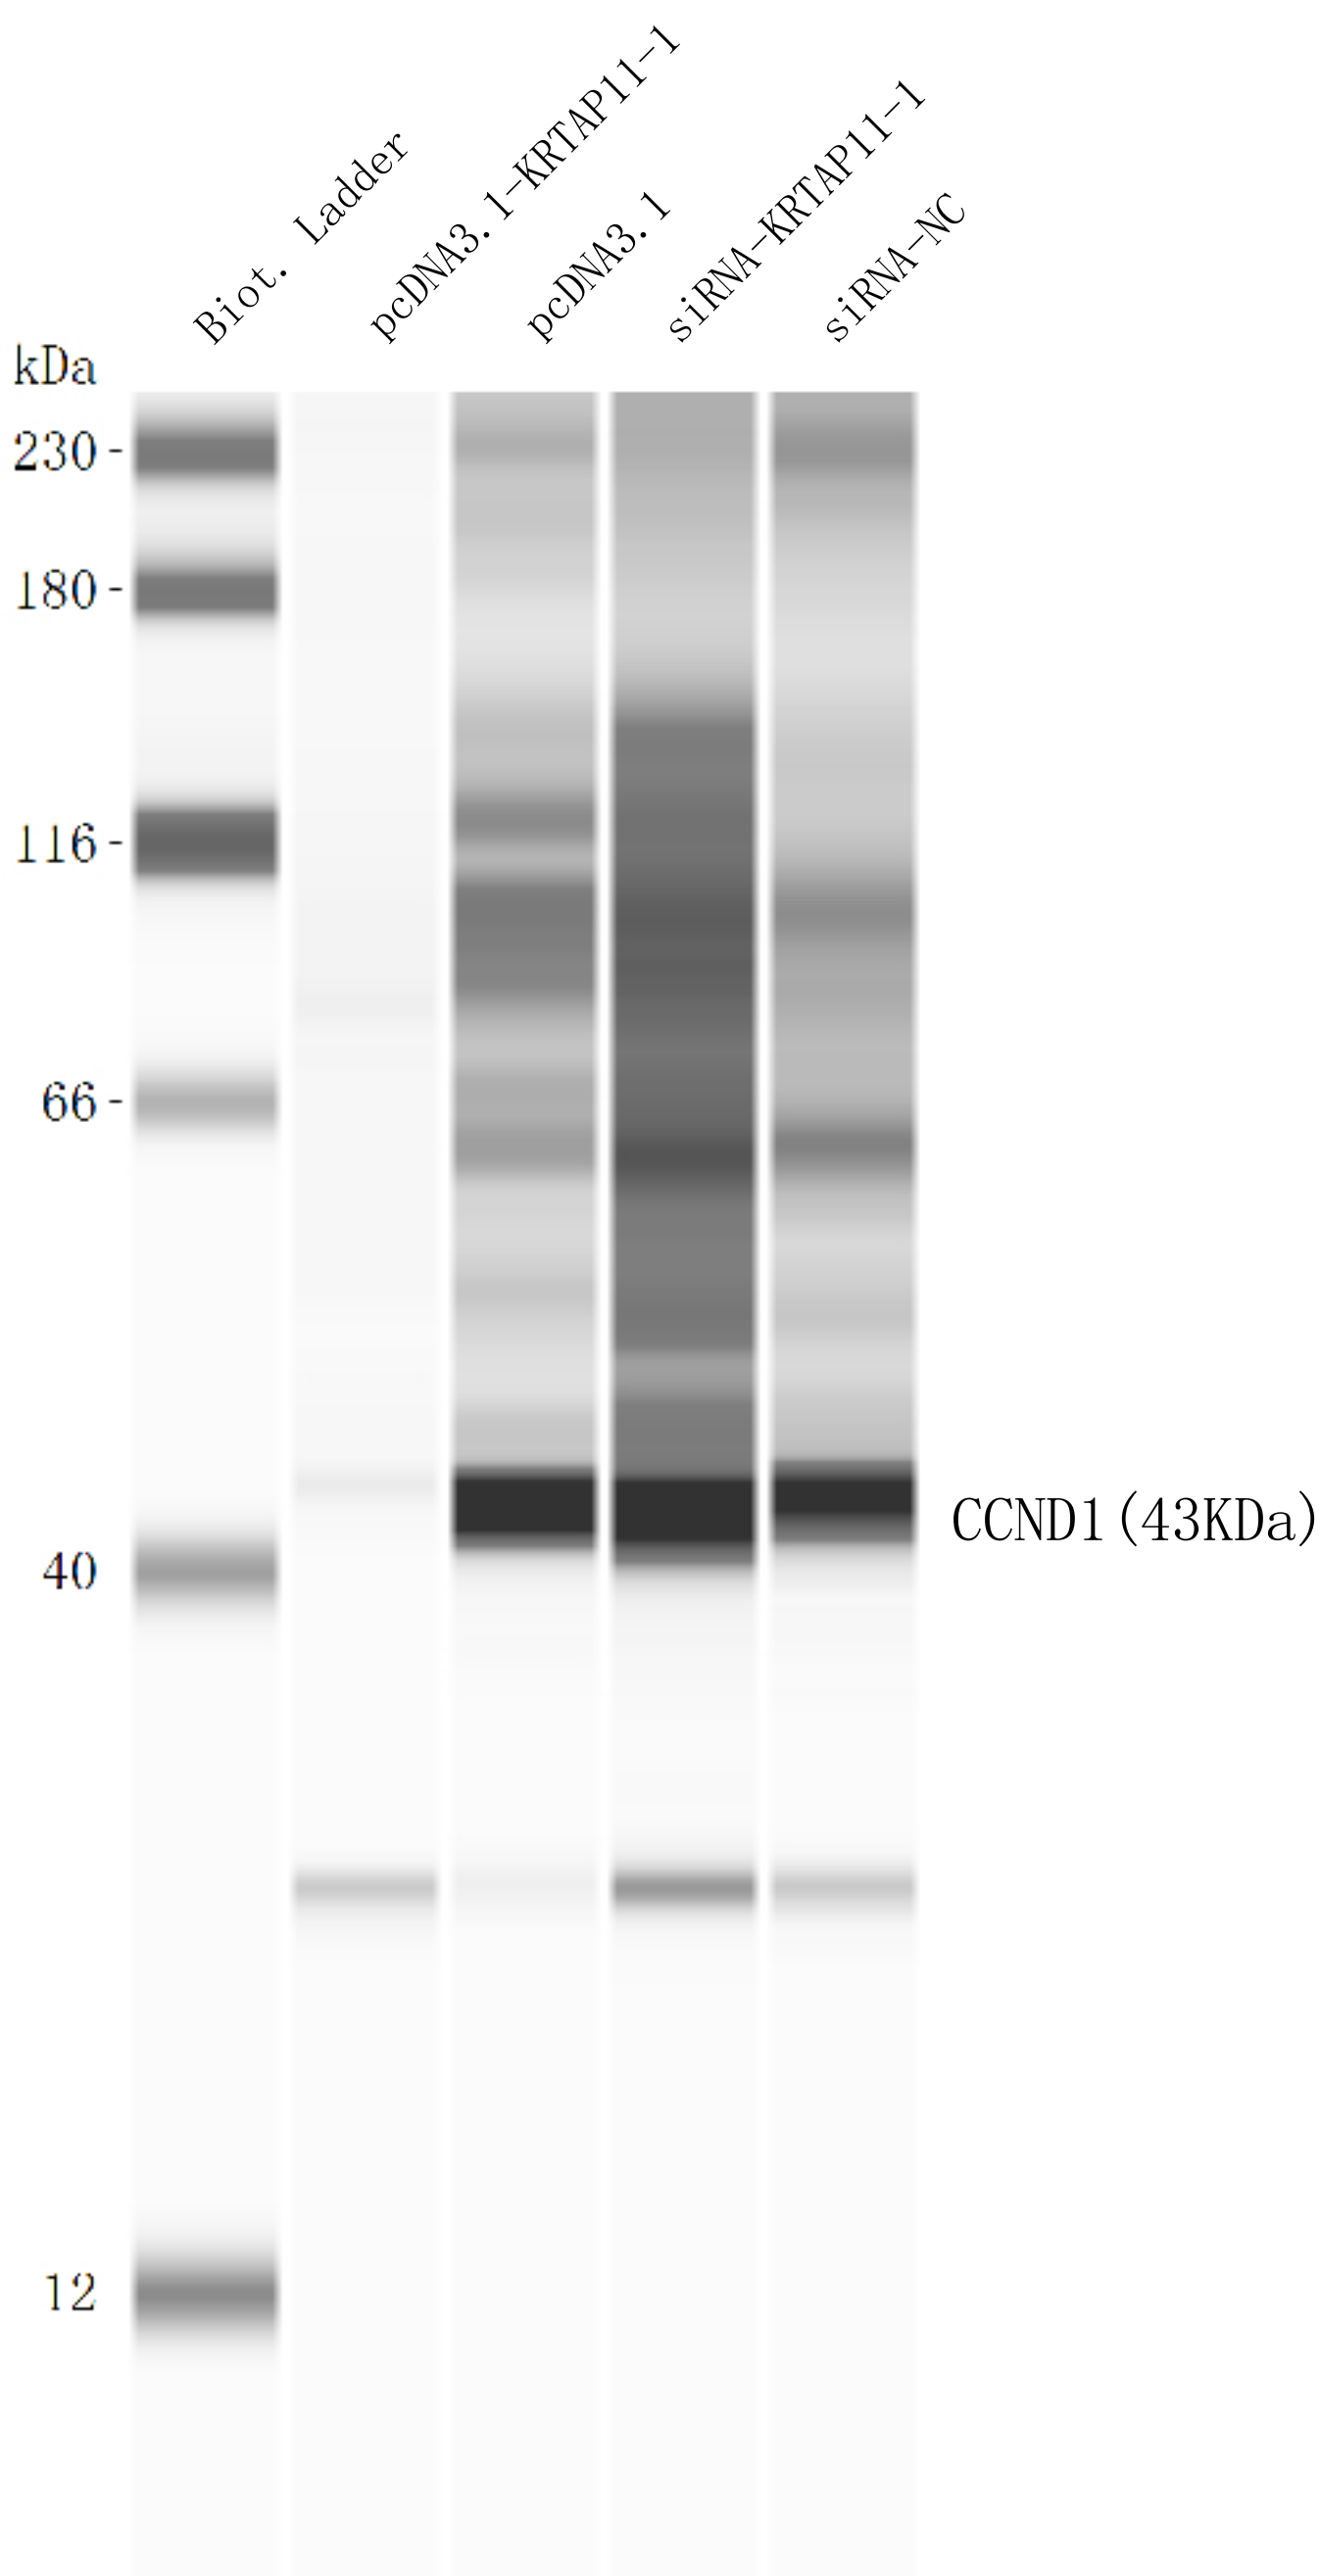

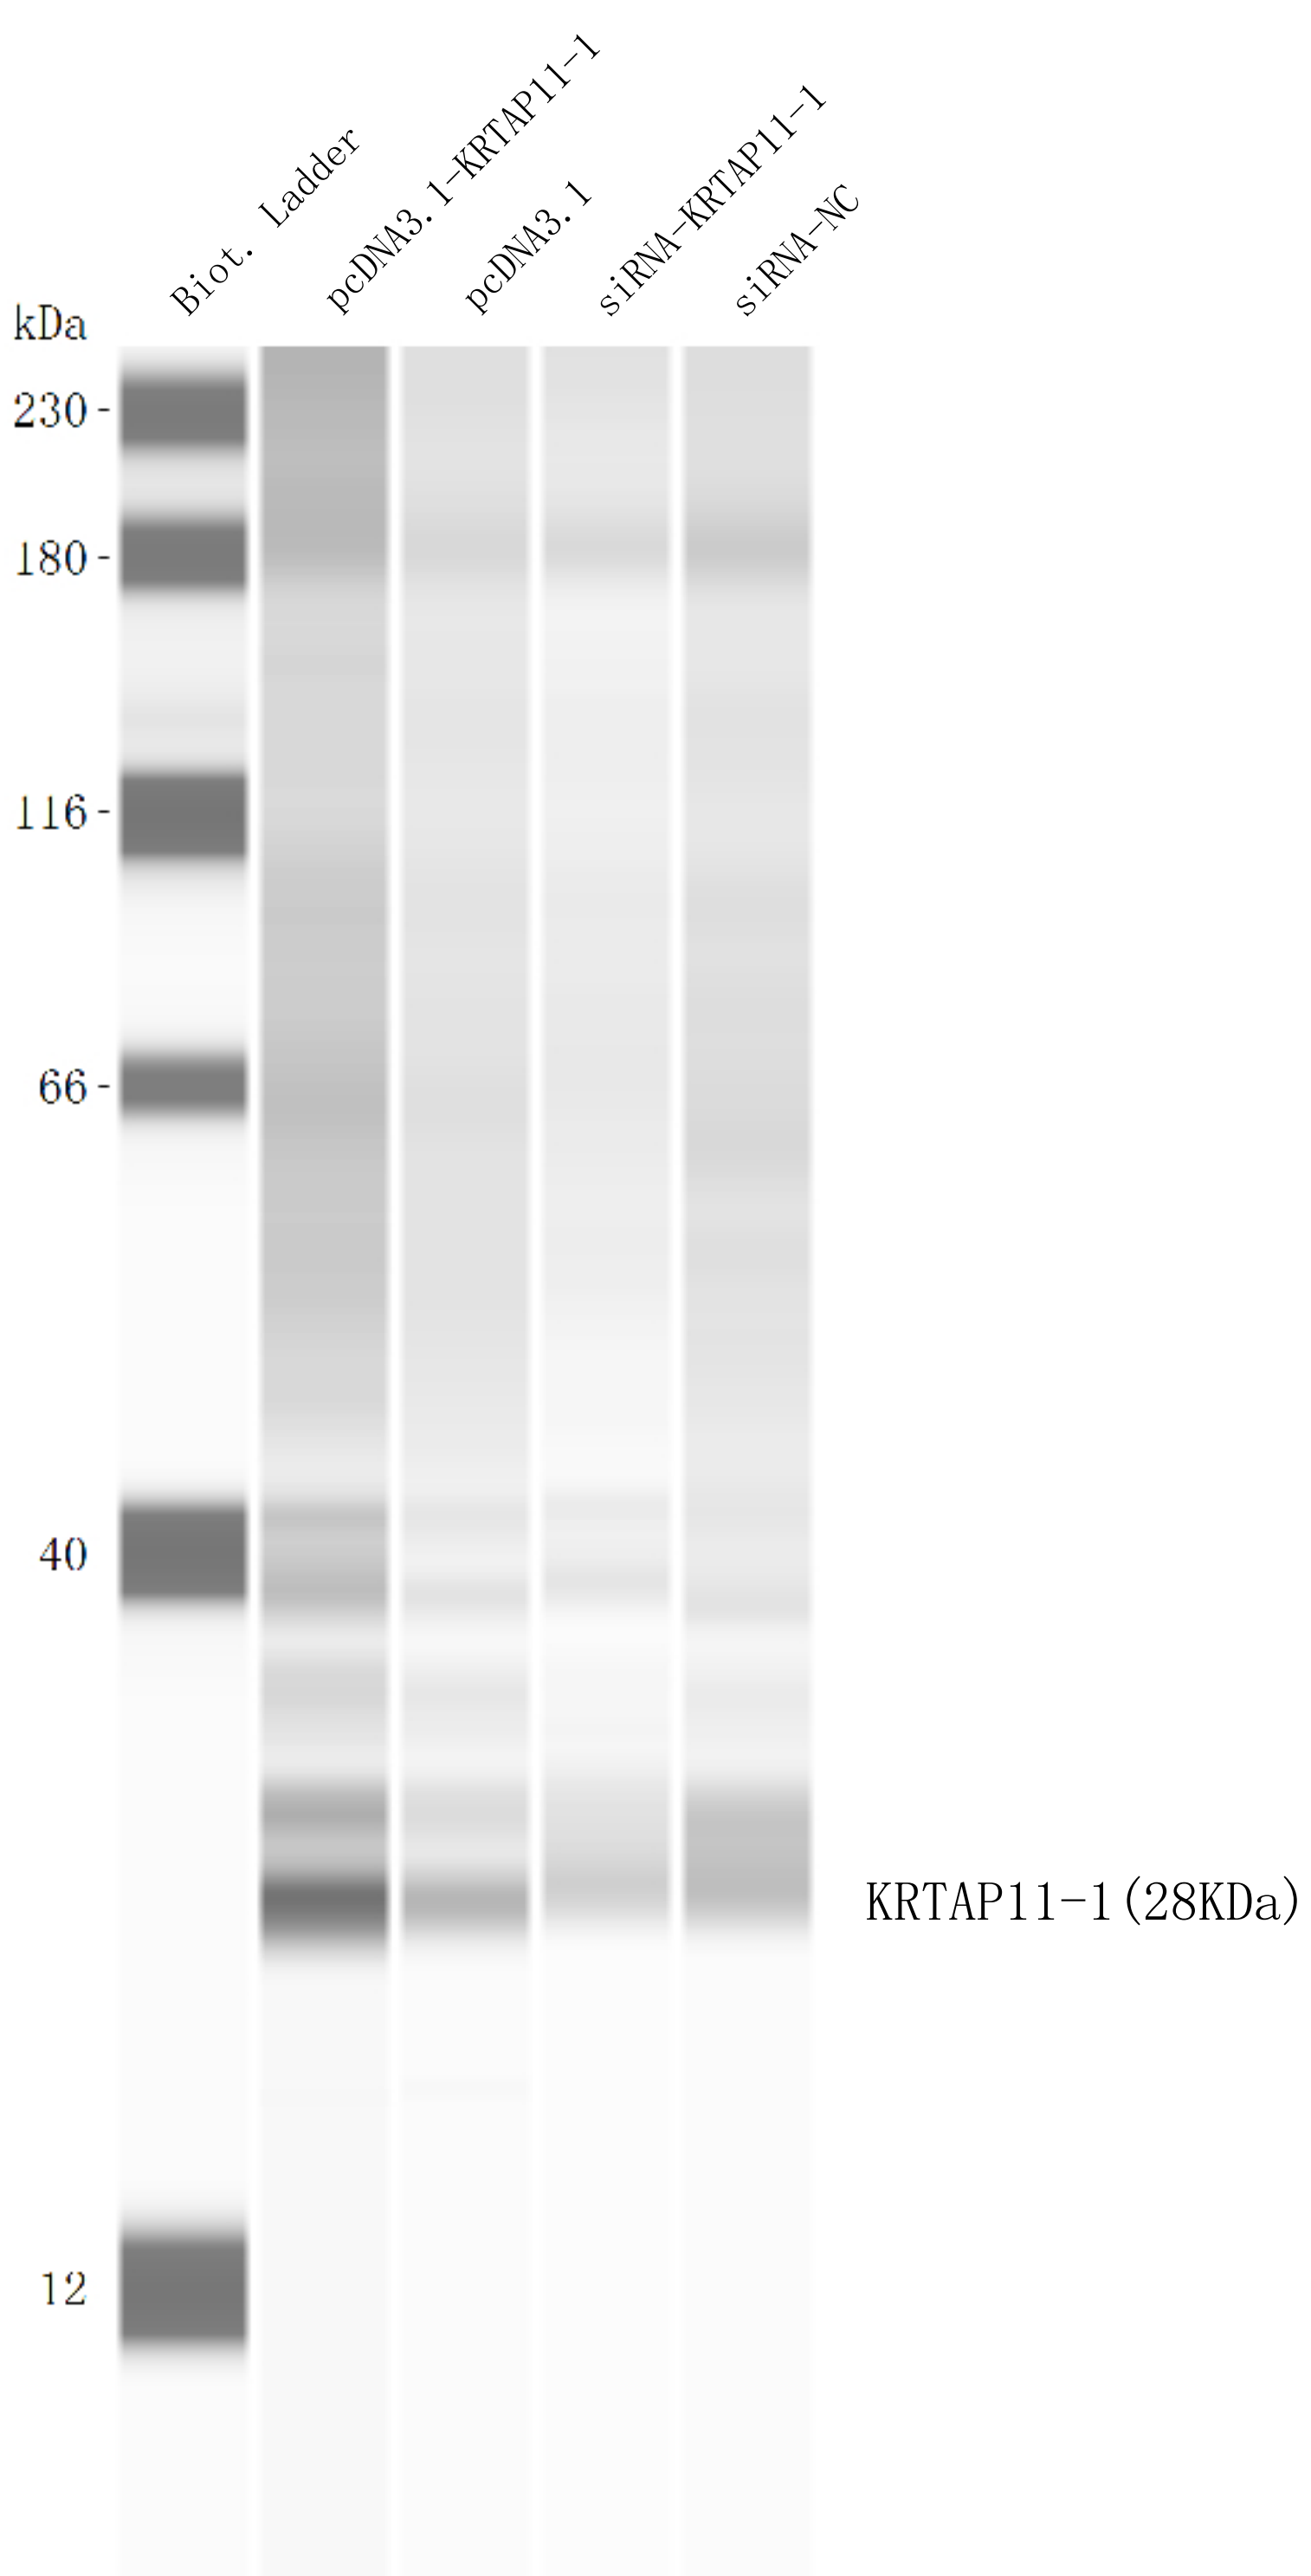

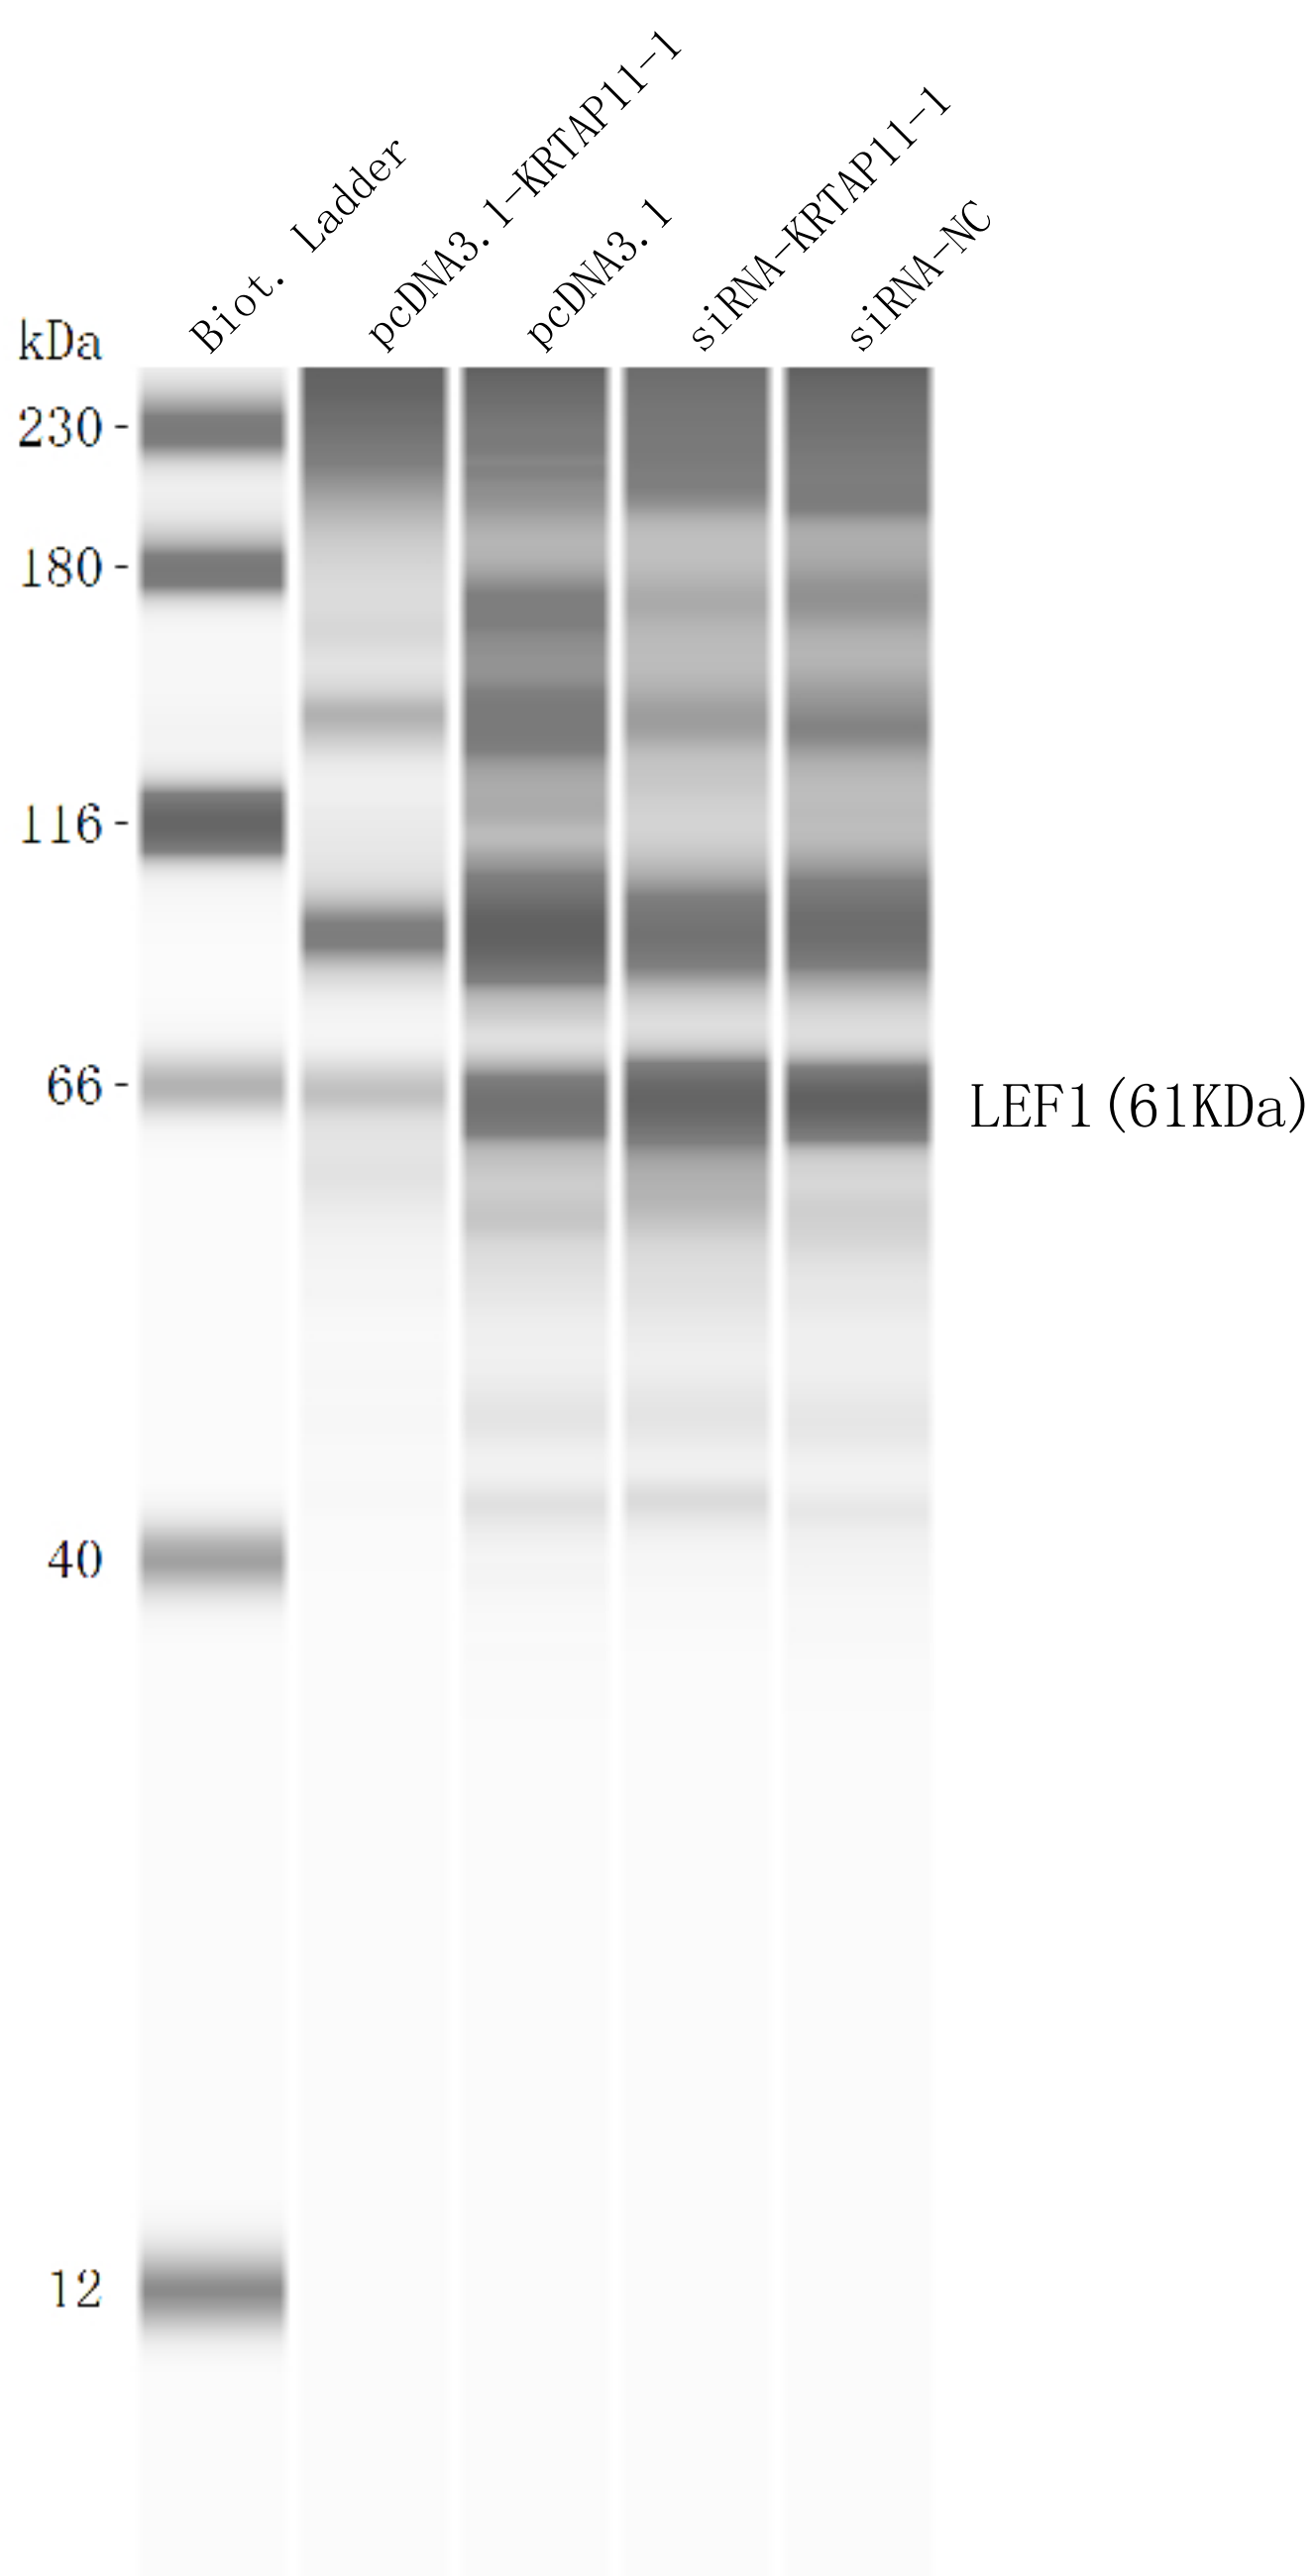

kDa

230 -

180 -

116 -

66 -

40

12

Biot. Ladder  
pcDNA3.1-KRTAP11-1  
pcDNA3.1  
siRNA-KRTAP11-1  
siRNA-NC

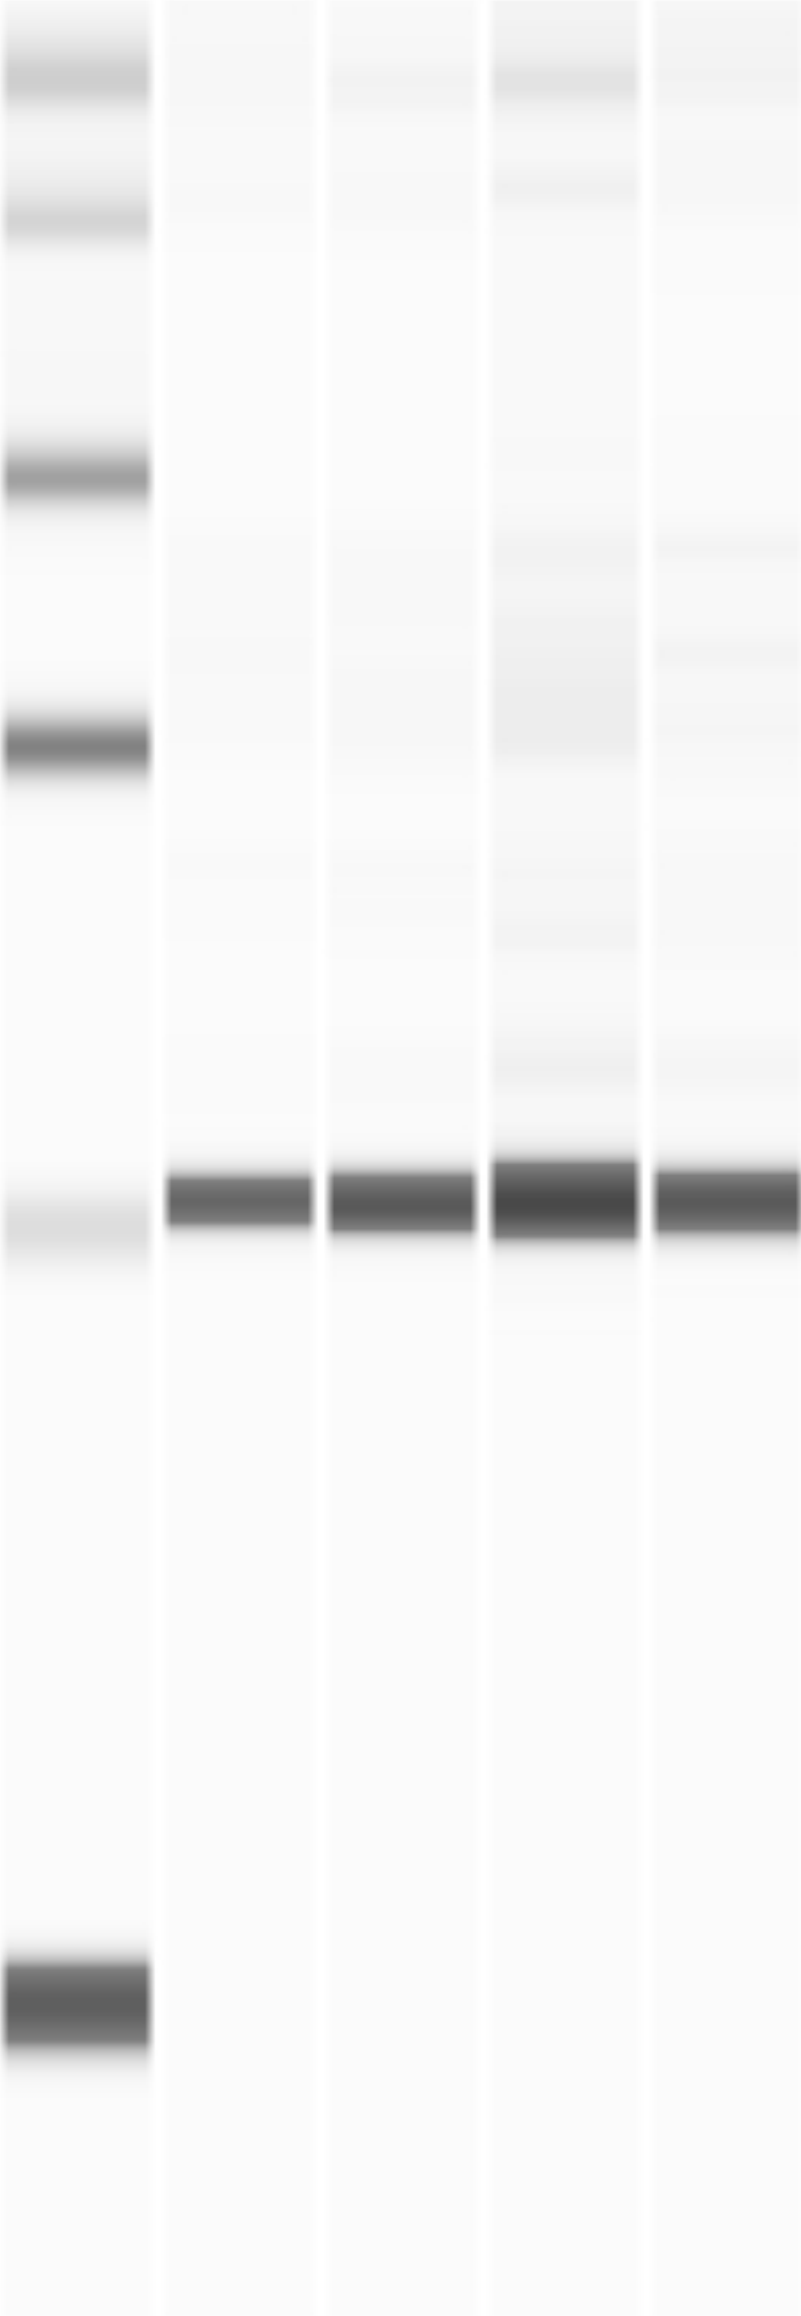

GAPDH (42KDa)
