# Supplementary material for: lncRNA2919 Suppresses Rabbit Dermal Papilla Cell Proliferation via trans-Regulatory Actions
Source: MDPI journal article supplement (doi:10.3390/cells11152443), 2022-08-06
Supplement: s1 [file s1]

**The full-length sequence of lncRNA2919 by 5' /3' RACE (5'- 3'):**

ATACTCAAGAACTCGTCCTTGACGTCTGACCAAACCTACAGTTCCTCACACCATGTG  
CCACCTTGGAAGCTACTACGGAGGCCGGAGCTTCGGCTACAGAAGCTTGGGTGGCCT  
GGGCTTTGGCCATGGAGGCTTCTGTGGCCTGGGCTTTGGCCATGGAGGTTTCGGTGGC  
CTGGGCCTGGGTCATGGCTATGGTTATGGATGTGGCAACTTCCACACATTTGGCTGTG  
GCTCTGGGTTTGGAGGCTTTGGACATAGCTACTACCGCCCAGTGTCTTATGGAGGATA  
TAGATTCTCTAGGTTCTACTGAAGAGTAAACTTGTTCCTTTGGACCATTGGAATCTTCAT  
GTCATCGTCATTTAGTTCTGATTCCAGATCCCCGAACTCCCTCTTTCAATTGCACAGCT  
GCCTTCTTGATAAACCAGCGAAGGCTGCCTCATGAACTCTTCAAAAGCAAGACTCCAT  
TCTGAAAACGAACACCAGAAGGAGCACCTGCAGCAGCAGCAAGAGGAACCCCTCCT  
GCAGACTGATCTGGAATCTCATCTTTCAAGCTATCTATCCCTCTCTTCCCCTTTAATAT  
CCCAATATGGCACTGACCCCCATGTTTCAATAAATTAATTTCAATAGCACAGCAAATT  
TTGTTTCATTTATTTATTTTATTTAAATTTTTTTATTTAAATAAATTATAAAATTTAATT  
TATTTTAAACTTTATTTTATTGTGCTAGGATATCAACCCTTAATTTTTGTGTACAGTAC  
AGTATTGTTGACTTTAGGAGCAACGCTGTACAGCAGGTCTCTAGAGCTTATTTCGTCTT  
GCTTGACTGAACTTTGTGCTGTTTTGTGCGGTAACCTCTCCATTTCCCTTTCCACTCAGC  
CCCAAGTAATCACCATTTCACTCTTTGTCCCCTTGATTTTGACTATTTTCAATACCTCA  
TATAAACACCATCCTGTGTTATATTTGTCTTTCTGTGTTTGACATCTTTCACTTGGTATC  
ATTACTATTGATTCATTTCCCTAGAACCAATCCCAACCTCCCTGATCTGGGGTTGCTCAT  
TCATCATCACATGATAGATACCTGGCACACAGAAGGCAGCAGTCAGAGAATATTTGT  
GGATTAGGAAATTTGGCTCAAGTCTTTTATCAGAAAGAATAATACATCATCCCAATTT  
TGGAATCTTGGCATCCTTTCCTACCTCTTTACCTCTTCTGGTGTCAATCCTACCCCCA  
GCCCCTAACACACACACACTATCGTTAGACATATCTCGCCCGATATAATTTCTCTTC  
ATCTTGGGAATTAACAGAATGCCTCAACAGTAACACTCTTTGTGAACTCCTTACAGG  
ATCAGGAAGAATGCCTTGCAATTTGGCAAAAAACAGAAGTTGAAAATTATTGACTG  
TTGAGGCAAGTTATGGGATGGGGAAAGAAATTTGCAACATATTAAGCCGGCGCCGTG  
GCTCACTAGGCTAATCCTCCACCTTGCGGCGCCGGCACACCGGGTTCTAGTCCCGGTT  
GGGGCGCCGGATTCTGTCCCGCTTGCCCCCTTCCAGGCCAGCTCTCTGTGCGGCCA  
GGGAGTGCAGTGGAGGATGGCCCAGGTGCTTGGGCCCTGCACCCCATGGGAGACCAG  
GAAAAGCACCTGGATCCTGGCTCCTGCCATCGGATCAGCGCGGTGCGCCGGCTGCAG  
CGGCGGCCATTGGAGGGTGAACCAACGGCAAAGGAAGACCTTTCTCTCTGTCTCTC  
TCTCTCACTGTCCACTCTGCCTGTCAAAAATTAAAAACAAACAAACAAACAAACAAA  
AAAAGAAATTTGCAACATATGTAAGTAAACTGGCAAATGTGCACCCTTGACAACC  
CTGTAAGTAATCCAATGCCTTTGCGCAACAGAATAGAAGCATGAATGTAGTTTGTCT  
TGCAGTGGGGGACGACAAAAAAAAAAAAAAAAAAAAAAAAAAAAA

**The full-length sequence of KRTAP11-1 mRNA by 5' /3' RACE (5'- 3'):**

TCTCACAACCTTAGGAGCTAACTTCACTGAAGTACCTTCAGCCCTCTCTCTGACATCAT  
GTCCTTCAGCTGCTCCACAAGAGATTGCTCTTCCAGGCCGATCGGAGGACGGTACACT  
GTCCCCGTGGCCCCAGCTGCCACGTCTTCAACCCTTGAAGGCGACTGCCTGAGTAGCA  
TCTATTTGCCAGTTCCTTCCAAACTGGCTCTTGGCTCCTGGACCACTGTCAGGAGTCC  
AGCTGCGAGCCTACTGTCTGCCAGCCTACTTGTTCAGCGAACTTCTTGATCTCCA  
GCCCTGCGCAGGTAACCTTGCTCGCGGCAAACTACCTGTGTCTCCAATCCCTGCTCAAC  
TGCCAGCAGCCGACCATTCACTTTGTCTCAAGTGGCTGTCAGCCCGTGGGAGGCATC

TCCAGTGTCTGCCAGCCAGTGGGCAGCATCTCGACTGTCTGCCAACCAGTGGGAGGA  
GTCTCTTCTGTCTGCCAACCAACCTGTGGGTACTCCCGGACGTACCAGCAGTCCTCCT  
GTGTGTCCAGCTGCCGAAGAAGCTTGCTAAGTGTGTAGGATCCAGTGAGTCAAGACTC  
CGTGACCTGCCAGCTGTGCTTCCAGGATTGTCCAGCATGCTGCCTGAAAACCTCTTCAT  
TGCTAAACACTATACTGACTGCCTGATTGCTGGCTGCTAGCCATGCACAAGCCGCCTT  
TGGCATGCTCAAAATTTTCTAGCCAGCACCAAGCTTATTTTAAGGGTTGGCCACTGGT  
GCTATGCAGTCGCTGGATGTTTCCAGAAGCTTTTTCATTTCATGCCACAGGCTCTGATA  
ATTTTGTTCATGTTTTGACCTTGCTGCTGAATCTCCTGACCTCTGCTTCTGTGTCTGTGA  
AAGAGGGAGCTTGTCTCACTATGTATTTCTCAATAAACCTGCATTAGTTGGCATTGCA  
AAAAAAAAAAAAAAAAAAAA

**The CDS sequence of STAT1 mRNA by cDNA cloning (5' - 3'):**

ATGTCTCAGTGGTATGAGCTTCAGCAGCTCGACTCTAAATTCCTGGAGCAGGTTCCACC  
AGCTCTATGATGACAGTTTTCCCATGGAAATTCGACAGTACCTGGCACAGTGGCTAGA  
AAATCAGGACTGGGAGCACGCCGCCAATGATGTTTCGTTTGCCACCATCCTCTTCCAT  
GACCTGCTCTCGCAGCTGGACGATCAGTACAGTCGCTTCTCTCTGGAGAACAAATTTTC  
TGTTGCAGCATAACATAAGGAAAAGCAAGCGGAACCTTCAGGACAATTTTCAAGAAG  
ACCCCATACAGATGTCTATGATCATCTATAACTGTCTGAAGGAGGAGCGGAAGATTC  
TGGAATATGCGCAGAGATTCAATCAGGCCAGTCGGGGAATATTCAGAGCACCGTGA  
TGTTAGACAAGCAGAAGGAGCTTGACAACAAAGTCAGAAATGTGAAGGAGCAAGTG  
ATGAATATAGAGCACGAAATCAAGACCCTGGAAGATCTACAAGATGAGTATGACTTC  
AAGTGCAAAACCTTGCAGAACCGAGAACATGAAGCCAATGGTGTGGCAAAGAGCGA  
CCAGAAGCAAGAGCAGCTGCTGCTCCAGAAGATGTATTTAATGCTGGACAACAAGAG  
GAAGGAAATCGTTTACAAGATGAGAGAGTTGTTGAATGCCACTGAGCTCACCCAGAA  
TGCCCTGATTAACGATGAGCTCGTGGAGTGGAAGCGGAGGCAGCAGAGCGCCTGTAT  
CGGGGGCCCCGCCAACGCGTGCCTGGACCAGCTGCAGAACTGGTTTCACCATAGTGGC  
AGAGAGTCTGCAGCAGGTTCTGCAGCAGCTTAAAAAGCTGGAGGAATTGGAACAGA  
AATTCACCTATGAACATGACCCTATCACCAGAACAACAGGTGCTATGGGATCGCA  
CCTTCAGTCTCTTCCAGCAGCTCATTTCAGAGCTCGTTCGTGGTGGAGAGACAGCCTTG  
CATGCCCCTCATCCTCAGAGACCGCTGGTCTTGAAGACTGGGGTGCAGTTCACTGTG  
AAGCTGAGGCTGTTGGTGAAACTGCAAGAGCTGAATTATAACTTGAAAGTCAAAGTC  
CTGTTTGACAAAGACGTGAATGAGAGAAACACAGTGAAAGGATTCAGGAAGTTCAAC  
ATCCTGGGCACACACACGAAGGTGATGAACATGGAGGAGTCCACCAACGGAAGTCTG  
GCGGCGGAATTCCGACACCTGCAACTGAAAGAACAGAAGAACGCTGGCAACAGGAC  
TAACGAGGGTCCTCTAATTGTAACCGAAGAGCTTCACTCCCTAAGTTTTGAAACCCAG  
CTGTGCCAGCCTGGCCTGGTCATTGACCTCGAGACGACTTCCCTGCCCTCGTGGTGA  
TCTCCAACGTCAGCCAGCTCCCGAGCGGTTGGGCGTCCATCCTGTGGTACAACATGCT  
GGTGGCGGAGCCTAGGAATCTGTCTTCTTCTGAACCCACCGTGTGCGCGATGGTCT  
CAGCTCTCGGAGGTACTGAGTTGGCAGTTTTCTCTGTTCACCAAACGCGGCCTCAACG  
GGGACCAGCTGAGCATGCTGGGAGAGAAGCTACTTGGTCCTAATGCCGGCCTCGATG  
GTCTTATTCCGTGGACGAGGTTCTGCAAGGAAAATATAAGTGACAAAAATTTCTCCTT  
CTGGCTGTGGATTGAAAACATCCTAGAACTGATTAAAAAGCACCTGCTGTGTCTATGG  
AATGATGGGTGCATCATGGGCTTCATCAGCAAGGAGCGAGAGCGCGCCCTGCTGAAG  
GACCAGCAGCCCGGCACGTTCTGCTGCGGTTTCAGCGAGAGCAGCCGGGAAGGCGCC

ATCACGTTACGTGGGTGGAGCGGTCCCAGAACGGAGGCGAACCTTATTTCCATGCG  
GTTGAGCCCTACACGAAGAAAGAACTTTCTGCTGTGACTTTCCCTGATATCATCCGCA  
ATTACAAAGTCATGGCTGCCGAGAATATTCCTGAGAACCCCCTGAAGTATCTGTATCC  
AAATATTGACAAGGACCATGCCTTCGGGAAGTATTACTCCAGGCCAAAGGAAGGGCA  
AGAACCCATGGAACTTGACGGCCCCAAAGGAACTGGATACATCAAGACTGAGTTGAT  
TTCTGTGTCTGAAGTTCACCCTTCTAGACTCCAGAGCACAGAAAACCTGCTGCCCATG  
TCTCCTGAGGAGTTTGATGAGGTGTCTCGGATAATGGGCCCTGTAGAATTTCGACAGTA  
TGATGAACGCAGTATAG
